# Supplementary material for: The atmospheric oxidation of dimethyl, diethyl, and diisopropyl ethers. The role of the intramolecular hydrogen shift in peroxy radicals
Source: Royal Society of Chemistry journal article supplement (doi:10.1039/c5cp07199b), 2016-01-01
Supplement: c5cp07199b1.pdf [file c5cp07199b1.pdf]

mesmer-input.txt

Mesmer Input Files

\*\*\*\*\* CH3OCH2O0

```
<?xml version="1.0" encoding="utf-8" ?>
<?xml-stylesheet type='text/xsl' href='../..//mesmer2.xsl' media='other'?>
<?xml-stylesheet type='text/xsl' href='../..//mesmer1.xsl' media='screen'?>
<me:mesmer xmlns="http://www.xml-cml.org/schema"
xmlns:me="http://www.chem.leeds.ac.uk/mesmer"
xmlns:xsi="http://www.w3.org/2001/XMLSchema-instance">
  <me:title>CH3OCH2_02_with_Internal_Rotations</me:title>
  <moleculeList>
    <molecule id="O2" description="oxygen">
      <propertyList>
        <property dictRef="me:ZPE">
          <scalar units="kJ/mol">0.0</scalar>
        </property>
        <property dictRef="me:rotConsts">
          <array units="cm-1">1.597738</array>
        </property>
        <property dictRef="me:symmetryNumber">
          <scalar>2</scalar>
        </property>
        <property dictRef="me:frequenciesScaleFactor">
          <scalar>0.974</scalar>
        </property>
        <property dictRef="me:vibFreqs">
          <array units="cm-1">1770.2010</array>
        </property>
        <property dictRef="me:MW">
          <scalar units="amu">32</scalar>
        </property>
        <property dictRef="me:spinMultiplicity">
          <scalar>3</scalar>
        </property>
      </propertyList>
      <me:DOSCMMethod>ClassicalRotors</me:DOSCMMethod>
    </molecule>
    <molecule id="NO" description="nitrogen">
      <propertyList>
        <property dictRef="me:ZPE">
          <scalar units="kJ/mol">0.0</scalar>
        </property>
        <property dictRef="me:rotConsts">
          <array units="cm-1">1.875414685</array>
        </property>
        <property dictRef="me:symmetryNumber">
          <scalar>2</scalar>
        </property>
        <property dictRef="me:frequenciesScaleFactor">
          <scalar>0.974</scalar>
        </property>
        <property dictRef="me:vibFreqs">
          <array units="cm-1">2074.7931</array>
        </property>
      </propertyList>
    </molecule>
  </moleculeList>
</me:mesmer>
```

```

mesmer-input.txt
  <property dictRef="me:MW">
    <scalar units="amu">30</scalar>
  </property>
  <property dictRef="me:spinMultiplicity">
    <scalar>2</scalar>
  </property>
</propertyList>
<me:DOSCMethod>ClassicalRotors</me:DOSCMethod>
</molecule>
<molecule id="CH3OCH2" description="radical">
  <propertyList>
    <property dictRef="me:ZPE">
      <scalar units="kJ/mol">0</scalar>
    </property>
    <property dictRef="me:rotConsts">
      <array units="cm-1">
        1.590988519
        0.361313349
        0.313224621
      </array>
    </property>
    <property dictRef="me:symmetryNumber">
      <scalar>1</scalar>
    </property>
    <property dictRef="me:frequenciesScaleFactor">
      <scalar>0.974</scalar>
    </property>
    <property dictRef="me:vibFreqs">
      <array units="cm-1">
        180.2479
        290.5574
        444.3161
        585.9479
        1006.8570
        1148.2030
        1182.9000
        1268.2200
        1324.3820
        1465.3290
        1503.5930
        1507.1000
        1516.8220
        3036.3100
        3100.8430
        3135.9670
        3168.7300
        3281.3070
      </array>
    </property>
    <property dictRef="me:MW">
      <scalar units="amu">45</scalar>
    </property>
    <property dictRef="me:spinMultiplicity">
      <scalar>2</scalar>
    </property>
    <property dictRef="me:epsilon">

```

mesmer-input.txt

```
<scalar>373</scalar>
</property>
<property dictRef="me:sigma">
  <scalar>4.73</scalar>
</property>
</propertyList>
<me:energyTransferModel xsi:type="me:ExponentialDown">
  <me:deltaEDown units="cm-1">250.0</me:deltaEDown>
</me:energyTransferModel>
<me:DOSCMMethod name="ClassicalRotors"/>
</molecule>
<molecule id="CH30CH200" description="R00">
<atomArray>
  <atom id="a1" elementType="C" x3="-0.914308" y3="0.540811" z3="-0.435651"/>
  <atom id="a2" elementType="O" x3="-0.290166" y3="-0.673833" z3="-0.397205"/>
  <atom id="a3" elementType="O" x3="0.037170" y3="1.623803" z3="-0.303507"/>
  <atom id="a4" elementType="O" spinMultiplicity="2" x3="0.207445" y3="1.957757"
z3="0.941003"/>
  <atom id="a5" elementType="C" x3="0.211860" y3="-1.041661" z3="0.877854"/>
  <atom id="a6" elementType="H" x3="-1.639485" y3="0.675870" z3="0.371212"/>
  <atom id="a7" elementType="H" x3="-1.348760" y3="0.668478" z3="-1.423591"/>
  <atom id="a8" elementType="H" x3="0.510674" y3="-2.083115" z3="0.803973"/>
  <atom id="a9" elementType="H" x3="-0.561814" y3="-0.929918" z3="1.641627"/>
  <atom id="a10" elementType="H" x3="1.073009" y3="-0.431121" z3="1.151755"/>
</atomArray>
<bondArray>
  <bond atomRefs2="a7 a1" order="1"/>
  <bond atomRefs2="a1 a2" order="1"/>
  <bond id="b1" atomRefs2="a1 a3" order="1"/>
  <bond atomRefs2="a1 a6" order="1"/>
  <bond id="b2" atomRefs2="a2 a5" order="1"/>
  <bond atomRefs2="a3 a4" order="1"/>
  <bond atomRefs2="a8 a5" order="1"/>
  <bond atomRefs2="a5 a10" order="1"/>
  <bond atomRefs2="a5 a9" order="1"/>
</bondArray>
<propertyList>
  <property dictRef="me:ZPE">
    <scalar units="kJ/mol">-145.0</scalar>
  </property>
  <property dictRef="me:rotConsts">
    <array units="cm-1">
      0.325453424
      0.137159785
      0.106390236
    </array>
  </property>
  <property dictRef="me:symmetryNumber">
    <scalar>1</scalar>
  </property>
  <property dictRef="me:frequenciesScaleFactor">
    <scalar>0.974</scalar>
  </property>
  <property dictRef="me:vibFreqs">
    <array units="cm-1">
      214.8518
```

mesmer-input.txt

398.6693  
474.5316  
604.6601  
919.4032  
993.3748  
1137.8660  
1182.2540  
1203.4900  
1263.1670  
1291.1490  
1343.3430  
1424.3930  
1477.0400  
1493.6760  
1506.9690  
1520.7800  
3043.6200  
3082.8600  
3117.8830  
3162.0370  
3183.4200

```
</array>
</property>
<property dictRef="me:MW">
  <scalar units="amu">77</scalar>
</property>
<property dictRef="me:spinMultiplicity">
  <scalar>2</scalar>
</property>
<property dictRef="me:eletronicExcitation">
  <array units="cm-1">0</array>
</property>
<property dictRef="me:epsilon">
  <scalar>373</scalar>
</property>
<property dictRef="me:sigma">
  <scalar>6.07</scalar>
</property>
</propertyList>
<me:energyTransferModel xsi:type="me:ExponentialDown">
  <me:deltaEDown units="cm-1">250.0</me:deltaEDown>
</me:energyTransferModel>
<me:DOSCMETHOD name="ClassicalRotors"/>
<me:ExtraDOSCMETHOD xsi:type="me:HinderedRotorQMID">
  <me:bondRef>b1</me:bondRef>
  <me:HinderedRotorPotential format="numerical" units="kJ/mol"
expansionSize="7" scale="1" UseSineTerms="yes">
    <me:PotentialPoint angle="0.0" potential="14.1334" />
    <me:PotentialPoint angle="10.0" potential="13.2162" />
    <me:PotentialPoint angle="20.0" potential="11.6421" />
    <me:PotentialPoint angle="30.0" potential="9.6274" />
    <me:PotentialPoint angle="40.0" potential="7.6480" />
    <me:PotentialPoint angle="50.0" potential="5.7252" />
    <me:PotentialPoint angle="60.0" potential="4.1568" />
    <me:PotentialPoint angle="70.0" potential="3.2440" />
    <me:PotentialPoint angle="80.0" potential="3.3164" />
```

mesmer-input.txt

```
<me:PotentialPoint angle= "90.0" potential= "4.2725" />
<me:PotentialPoint angle= "100.0" potential= "5.5832" />
<me:PotentialPoint angle= "110.0" potential= "7.1123" />
<me:PotentialPoint angle= "120.0" potential= "7.9283" />
<me:PotentialPoint angle= "130.0" potential= "8.2733" />
<me:PotentialPoint angle= "140.0" potential= "8.0165" />
<me:PotentialPoint angle= "150.0" potential= "7.1359" />
<me:PotentialPoint angle= "160.0" potential= "5.9852" />
<me:PotentialPoint angle= "170.0" potential= "4.8809" />
<me:PotentialPoint angle= "180.0" potential= "4.1512" />
<me:PotentialPoint angle= "190.0" potential= "3.8985" />
<me:PotentialPoint angle= "200.0" potential= "4.0402" />
<me:PotentialPoint angle= "210.0" potential= "4.2240" />
<me:PotentialPoint angle= "220.0" potential= "4.1973" />
<me:PotentialPoint angle= "230.0" potential= "3.7980" />
<me:PotentialPoint angle= "240.0" potential= "2.8950" />
<me:PotentialPoint angle= "250.0" potential= "1.6915" />
<me:PotentialPoint angle= "260.0" potential= "0.4901" />
<me:PotentialPoint angle= "270.0" potential= "0.0" />
<me:PotentialPoint angle= "280.0" potential= "0.7919" />
<me:PotentialPoint angle= "290.0" potential= "2.7001" />
<me:PotentialPoint angle= "300.0" potential= "5.1737" />
<me:PotentialPoint angle= "310.0" potential= "7.6800" />
<me:PotentialPoint angle= "320.0" potential= "10.1040" />
<me:PotentialPoint angle= "330.0" potential= "13.8251" />
<me:PotentialPoint angle= "340.0" potential= "13.6838" />
<me:PotentialPoint angle= "350.0" potential= "14.2930" />
<me:PotentialPoint angle= "360.0" potential= "14.1334" />
</me: HinderedRotorPotential>
<me:periodicity>1</me:periodicity>
</me:ExtraDOSMethod>
<me:ExtraDOSMethod xsi:type="me:HinderedRotorQMID">
  <me:bondRef>b2</me:bondRef>
  <me:HinderedRotorPotential format="analytical" units="kJ/mol">
    <me:PotentialPoint index="0" coefficient="3.89" />
    <me:PotentialPoint index="3" coefficient="-3.89" />
  </me:HinderedRotorPotential>
  <me:periodicity>3</me:periodicity>
</me:ExtraDOSMethod>
</molecule>
<molecule id="CH20CH200H">
  <propertyList>
    <property dictRef="me:ZPE">
      <scalar units="kJ/mol">-105.5</scalar>
    </property>
    <property dictRef="me:rotConsts">
      <array units="cm-1">
        0.343345605
        0.125450032
        0.114002935
      </array>
    </property>
    <property dictRef="me:symmetryNumber">
      <scalar>1</scalar>
    </property>
    <property dictRef="me:frequenciesScaleFactor">
```

mesmer-input.txt

```
<scalar>0.974</scalar>
</property>
<property dictRef="me:vibFreqs">
  <array units="cm-1">
    83.6909
    200.4650
    277.9852
    315.1313
    371.9879
    480.7373
    533.4745
    669.1102
    966.8152
    1006.5010
    1123.5130
    1137.5360
    1234.6950
    1276.1530
    1332.2140
    1431.2720
    1443.5390
    1481.8310
    1508.7240
    3087.7050
    3159.5390
    3169.4050
    3301.8900
    3797.4600
  </array>
</property>
<property dictRef="me:MW">
  <scalar units="amu">77</scalar>
</property>
<property dictRef="me:spinMultiplicity">
  <scalar>2</scalar>
</property>
<property dictRef="me:epsilon">
  <scalar>373</scalar>
</property>
<property dictRef="me:sigma">
  <scalar>6.07</scalar>
</property>
</propertyList>
<me:energyTransferModel xsi:type="me:ExponentialDown">
  <me:deltaEDown units="cm-1">250.0</me:deltaEDown>
</me:energyTransferModel>
<me:DOSCMethod>ClassicalRotors</me:DOSCMethod>
</molecule>
<molecule id="TS_H_shift">
  <propertyList>
    <property dictRef="me:ZPE">
      <scalar units="kJ/mol">-59.3</scalar>
    </property>
    <property dictRef="me:rotConsts">
      <array units="cm-1">
        0.290444891
```

mesmer-input.txt

```
    0.177124954
    0.12193341
  </array>
</property>
<property dictRef="me:symmetryNumber">
  <scalar>1</scalar>
</property>
<property dictRef="me:frequenciesScaleFactor">
  <scalar>0.974</scalar>
</property>
<property dictRef="me:vibFreqs">
  <array units="cm-1">
    259.9200
    415.9508
    480.6133
    495.0158
    599.3272
    710.1579
    966.2378
    1011.7750
    1089.3470
    1143.2910
    1162.6650
    1219.3700
    1222.5620
    1275.7930
    1320.9710
    1411.3090
    1484.8020
    1504.5240
    1670.8700
    3067.0520
    3075.9860
    3187.9590
    3220.3200
  </array>
</property>
<property dictRef="me:MW">
  <scalar units="amu">77</scalar>
</property>
<property dictRef="me:spinMultiplicity">
  <scalar>2</scalar>
</property>
<property dictRef="me:imFreqs">
  <scalar units="cm-1">1868.4</scalar>
</property>
</propertyList>
<me:DOSCMETHOD>ClassicalRotors</me:DOSCMETHOD>
</molecule>
<molecule id="OOCH2OCH2OOH">
  <propertyList>
    <property dictRef="me:ZPE">
      <scalar units="kJ/mol">-250</scalar>
    </property>
    <property dictRef="me:rotConsts">
      <array units="cm-1">
```

```

0.157444374
0.070631983
0.054923849
  </array>
</property>
<property dictRef="me:symmetryNumber">
  <scalar>1</scalar>
</property>
<property dictRef="me:frequenciesScaleFactor">
  <scalar>0.974</scalar>
</property>
<property dictRef="me:vibFreqs">
  <array units="cm-1">
81.9261
105.0616
155.0602
226.9255
314.251
372.3583
424.2656
456.0055
528.59
682.9059
963.6882
981.4374
1018.727
1106.512
1134.017
1184.574
1234.109
1289.467
1314.044
1330.885
1411.263
1439.189
1462.25
1490.188
1517.613
3090.145
3096.316
3170.854
3180.728
3779.973
  </array>
</property>
<property dictRef="me:MW">
  <scalar units="amu">109</scalar>
</property>
<property dictRef="me:spinMultiplicity">
  <scalar>2</scalar>
</property>
</propertyList>
<me:DOSMethod>ClassicalRotors</me:DOSMethod>
</molecule>
<molecule id="CH3OCH2O">
  <propertyList>

```



```

mesmer-input.txt
  <property dictRef="me:ZPE">
    <scalar units="kJ/mol">-300</scalar>
  </property>
  <property dictRef="me:rotConsts">
    <array units="cm-1">
0.671364352
0.212764494
0.180484351
    </array>
  </property>
  <property dictRef="me:symmetryNumber">
    <scalar>1</scalar>
  </property>
  <property dictRef="me:frequenciesScaleFactor">
    <scalar>0.974</scalar>
  </property>
  <property dictRef="me:vibFreqs">
    <array units="cm-1">
145.6126
209.068
365.3598
613.4597
809.2092
976.2433
1077.506
1150.24
1185.712
1225.023
1270.586
1352.573
1398.154
1484.292
1500.532
1520.514
2899.05
3026.579
3030.3
3104.304
3157.224
    </array>
  </property>
  <property dictRef="me:MW">
    <scalar units="amu">61</scalar>
  </property>
  <property dictRef="me:spinMultiplicity">
    <scalar>2</scalar>
  </property>
</propertyList>
<me:DOSMethod>ClassicalRotors</me:DOSMethod>
</molecule>
<molecule id="N2">
  <atom elementType="He" />
  <propertyList>
    <property dictRef="me:epsilon">
      <scalar>48.0</scalar>
    </property>
  </propertyList>

```

```

mesmer-input.txt
  <property dictRef="me:sigma">
    <scalar>3.9</scalar>
  </property>
  <property dictRef="me:MW">
    <scalar units="amu">28.0</scalar>
  </property>
</propertyList>
</molecule>
</moleculeList>
<reactionList>
  <reaction id="R_00">
    <reactant>
      <molecule ref="CH3OCH2" role="deficientReactant" />
    </reactant>
    <reactant>
      <molecule ref="O2" role="excessReactant" />
    </reactant>
    <product>
      <molecule ref="CH3OCH2OO" role="modelled" />
    </product>
    <me:MCRCMethod xsi:type="me:MesmerILT">
      <me:preExponential units="cm3molecule-1s-1">6.00e-12</me:preExponential>
      <me:activationEnergy units="kJ/mol">0.0</me:activationEnergy>
      <me:TInfinity>298.0</me:TInfinity>
      <me:nInfinity>0.00000000001</me:nInfinity>
    </me:MCRCMethod>
    <me:excessReactantConc>5E18</me:excessReactantConc>
  </reaction>
  <reaction id="H_shift">
    <reactant>
      <molecule ref="CH3OCH2OO" role="modelled" />
    </reactant>
    <product>
      <molecule ref="CH2OCH2OOH" role="modelled" />
    </product>
    <me:transitionState>
      <molecule ref="TS_H_shift" role="transitionState" />
    </me:transitionState>
    <me:tunneling name="Eckart"/>
    <me:MCRCMethod name="SimpleRRKM"/>
  </reaction>
  <reaction id="CH2OCH2OOH_OOCH2OCH2OOH">
    <reactant>
      <molecule ref="CH2OCH2OOH" role="modelled" />
    </reactant>
    <reactant>
      <molecule ref="O2" role="excessReactant" />
    </reactant>
    <product>
      <molecule ref="OOCH2OCH2OOH" role="sink" />
    </product>
    <me:MCRCMethod name="SimpleBimolecularSink"/>
  </reaction>
<me:BimolecularLossRateCoefficient>6.00e-12</me:BimolecularLossRateCoefficient>
  <me:excessReactantConc>5E18</me:excessReactantConc>
</reaction>

```

mesmer-input.txt

```
<reaction id="CH3OCH200_CH300CH20">
  <reactant>
    <molecule ref="CH3OCH200" role="modelled" />
  </reactant>
  <product>
    <molecule ref="CH3OCH20" role="sink" />
  </product>
  <me:MCRCMethod xsi:type="me:MesmerILT">
    <me:preExponential units="s-1">0.0001</me:preExponential>
    <me:activationEnergy units="kJ/mol">0.0</me:activationEnergy>
    <me:TInfinity>298.0</me:TInfinity>
    <me:nInfinity>0.00000001</me:nInfinity>
  </me:MCRCMethod>
</reaction>
</reactionList>
<me:conditions>
  <me:bathGas>N2</me:bathGas>
  <me:PTs>
    <me:PTpair units="Torr" P="760.0" T="233.0" />
    <me:PTpair units="Torr" P="760.0" T="243.0" />
    <me:PTpair units="Torr" P="760.0" T="253.0" />
    <me:PTpair units="Torr" P="760.0" T="263.0" />
    <me:PTpair units="Torr" P="760.0" T="273.0" />
    <me:PTpair units="Torr" P="760.0" T="283.0" />
    <me:PTpair units="Torr" P="760.0" T="293.0" />
    <me:PTpair units="Torr" P="760.0" T="298.0" />
    <me:PTpair units="Torr" P="760.0" T="303.0" />
    <me:PTpair units="Torr" P="760.0" T="313.0" />
    <me:PTpair units="Torr" P="760.0" T="323.0" />
    <me:PTpair units="Torr" P="760.0" T="333.0" />
  </me:PTs>
  <me:InitialPopulation>
    <me:molecule ref="CH3OCH2" population="1.0" />
  </me:InitialPopulation>
</me:conditions>
<me:modelParameters>
  <!--Specify grain size directly...-->
  <me:grainSize units="cm-1">50</me:grainSize>
  <!--...or by the total number of grains
    <me:numberOfGrains> 500 </me:numberOfGrains>-->
  <!--Specify increased energy range
    <me:maxTemperature>6000</me:maxTemperature>-->
  <me:energyAboveTheTopHill>25.0</me:energyAboveTheTopHill>
  <me:automaticallySetMaxEne>1.0e-09</me:automaticallySetMaxEne>
</me:modelParameters>
<me:control>
  <me:printSpeciesProfile />
  <me:testRateConstants />
  <me:eigenvalues>10</me:eigenvalues>
</me:control>
</me:mesmer>
```

\*\*\*\*\* HOOCH2OCH200

<?xml version="1.0" encoding="utf-8" ?>

mesmer-input.txt

```
<?xml-stylesheet type='text/xsl' href='.././mesmer2.xsl' media='other'?>
<?xml-stylesheet type='text/xsl' href='.././mesmer1.xsl' media='screen'?>
<me:mesmer xmlns="http://www.xml-cml.org/schema"
xmlns:me="http://www.chem.leeds.ac.uk/mesmer"
xmlns:xsi="http://www.w3.org/2001/XMLSchema-instance">
  <me:title>H-Shift in OOC2H2OH</me:title>
  <moleculeList>
    <molecule id="Q200">
      <propertyList>
        <property dictRef="me:ZPE">
          <scalar units="kJ/mol">0.0</scalar>
        </property>
        <property dictRef="me:rotConsts">
          <array units="cm-1">
            0.190750
            0.104448
            0.073688
          </array>
        </property>
        <property dictRef="me:symmetryNumber">
          <scalar>1</scalar>
        </property>
        <property dictRef="me:frequenciesScaleFactor">
          <scalar>0.974</scalar>
        </property>
        <property dictRef="me:vibFreqs">
          <array units="cm-1">
            86.8670
            113.6269
            190.9687
            374.0242
            429.5281
            491.7337
            556.1609
            620.1571
            890.0228
            968.3785
            1061.4826
            1154.5877
            1159.3329
            1206.0769
            1295.0611
            1318.7591
            1348.5231
            1403.7202
            1433.4829
            1462.1099
            1494.8781
            1524.8097
            3050.9384
            3086.2677
            3163.4672
            3181.3714
            3859.9650
          </array>
        </property>
      </propertyList>
    </molecule>
  </moleculeList>
</me:mesmer>
```

```

mesmer-input.txt
<property dictRef="me:MW">
  <scalar units="amu">93.01878</scalar>
</property>
<property dictRef="me:spinMultiplicity">
  <scalar>2</scalar>
</property>
<property dictRef="me:epsilon">
  <scalar>600.0</scalar>
</property>
<property dictRef="me:sigma">
  <scalar>5.6</scalar>
</property>
</propertyList>
<me:energyTransferModel xsi:type="me:ExponentialDown">
  <me:deltaEDown units="cm-1">250.0</me:deltaEDown>
</me:energyTransferModel>
<me:DOSCMethod>ClassicalRotors</me:DOSCMethod>
</molecule>
<molecule id="TS_H_shift">
  <propertyList>
    <property dictRef="me:ZPE">
      <scalar units="kJ/mol">74.6</scalar>
    </property>
    <property dictRef="me:rotConsts">
      <array units="cm-1">
        0.225972
        0.091518
        0.072834
      </array>
    </property>
    <property dictRef="me:symmetryNumber">
      <scalar>1</scalar>
    </property>
    <property dictRef="me:frequenciesScaleFactor">
      <scalar>0.974</scalar>
    </property>
    <property dictRef="me:vibFreqs">
      <array units="cm-1">
        116.9832
        230.2992
        376.0804
        428.9020
        450.6814
        509.9408
        534.6098
        695.4711
        990.6678
        1001.0533
        1061.7271
        1108.6146
        1148.5009
        1201.5196
        1219.1640
        1300.4416
        1319.7670
        1352.6175
      </array>
    </property>
  </propertyList>
</molecule>

```

mesmer-input.txt

1402.3178  
1432.2788  
1504.0727  
1678.7658  
3079.5749  
3084.1211  
3183.6803  
3867.4440

</array>

</property>

<property dictRef="me:MW">

<scalar units="amu">93.01878</scalar>

</property>

<property dictRef="me:spinMultiplicity">

<scalar>2</scalar>

</property>

<property dictRef="me:imFreqs">

<scalar units="cm-1">1743.3308</scalar>

</property>

</propertyList>

<me:DOSMethod>ClassicalRotors</me:DOSMethod>

</molecule>

<molecule id="Product">

<propertyList>

<property dictRef="me:ZPE">

<scalar units="kJ/mol">35.0</scalar>

</property>

<property dictRef="me:rotConsts">

<array units="cm-1">

0.157444374

0.070631983

0.054923849

</array>

</property>

<property dictRef="me:symmetryNumber">

<scalar>1</scalar>

</property>

<property dictRef="me:frequenciesScaleFactor">

<scalar>0.974</scalar>

</property>

<property dictRef="me:vibFreqs">

<array units="cm-1">

81.9261

105.0616

155.0602

226.9255

314.251

372.3583

424.2656

456.0055

528.59

682.9059

963.6882

981.4374

1018.727

1106.512

1134.017  
 1184.574  
 1234.109  
 1289.467  
 1314.044  
 1330.885  
 1411.263  
 1439.189  
 1462.25  
 1490.188  
 1517.613  
 3090.145  
 3096.316  
 3170.854  
 3180.728  
 3779.973

```

    </array>
  </property>
  <property dictRef="me:MW">
    <scalar units="amu">109</scalar>
  </property>
  <property dictRef="me:spinMultiplicity">
    <scalar>2</scalar>
  </property>
</propertyList>
<me:DOSMethod>ClassicalRotors</me:DOSMethod>
</molecule>
<molecule id="N2">
  <atom elementType="N2" />
  <propertyList>
    <property dictRef="me:epsilon">
      <scalar>48.0</scalar>
    </property>
    <property dictRef="me:sigma">
      <scalar>3.9</scalar>
    </property>
    <property dictRef="me:MW">
      <scalar units="amu">28.0</scalar>
    </property>
  </propertyList>
</molecule>
</moleculeList>
<reactionList>
  <reaction id="H_shift">
    <reactant>
      <molecule ref="Q200" role="modelled" />
    </reactant>
    <product>
      <molecule ref="Product" role="sink" />
    </product>
    <me:transitionState>
      <molecule ref="TS_H_shift" role="transitionState" />
    </me:transitionState>
    <me:tunneling name="Eckart"/>
    <me:MCRCMethod name="SimpleRRKM"/>
  </reaction>

```

```

</reactionList>
<me:conditions>
  <me:bathGas>N2</me:bathGas>
  <me:PTs>
    <me:PTpair units="Torr" P="760.0" T="233.0" />
    <me:PTpair units="Torr" P="760.0" T="243.0" />
    <me:PTpair units="Torr" P="760.0" T="253.0" />
    <me:PTpair units="Torr" P="760.0" T="263.0" />
    <me:PTpair units="Torr" P="760.0" T="273.0" />
    <me:PTpair units="Torr" P="760.0" T="283.0" />
    <me:PTpair units="Torr" P="760.0" T="293.0" />
    <me:PTpair units="Torr" P="760.0" T="298.0" />
    <me:PTpair units="Torr" P="760.0" T="303.0" />
    <me:PTpair units="Torr" P="760.0" T="313.0" />
    <me:PTpair units="Torr" P="760.0" T="323.0" />
    <me:PTpair units="Torr" P="760.0" T="333.0" />
    <me:PTpair units="Torr" P="760.0" T="343.0" />
  </me:PTs>
  <me:InitialPopulation>
    <me:molecule ref="Q200" population="1.0" />
  </me:InitialPopulation>
</me:conditions>
<me:modelParameters>
  <!--Specify grain size directly...-->
  <me:grainSize units="cm-1">50</me:grainSize>
  <!--...or by the total number of grains
    <me:numberOfGrains> 500 </me:numberOfGrains>-->
  <!--Specify increased energy range
    <me:maxTemperature>6000</me:maxTemperature>-->
  <me:energyAboveTheTopHill>30.0</me:energyAboveTheTopHill>
  <me:automaticallySetMaxEne>1.0e-09</me:automaticallySetMaxEne>
</me:modelParameters>
<me:control>
  <me:printSpeciesProfile />
  <me:testRateConstants />
  <me:eigenvalues>10</me:eigenvalues>
</me:control>
</me:mesmer>

```

\*\*\*\*\* CH3CH2OCH(00)CH3

```

<?xml version="1.0" encoding="utf-8" ?>
<?xml-stylesheet type='text/xsl' href='../..'/mesmer2.xsl' media='other' ?>
<?xml-stylesheet type='text/xsl' href='../..'/mesmer1.xsl' media='screen' ?>
<me:mesmer xmlns="http://www.xml-cml.org/schema"
xmlns:me="http://www.chem.leeds.ac.uk/mesmer"
xmlns:xsi="http://www.w3.org/2001/XMLSchema-instance">
  <me:title>DEEyl + O2 With Internal Rotation</me:title>
  <moleculeList>
    <molecule id="O2" description="oxygen">
      <propertyList>
        <property dictRef="me:ZPE">
          <scalar units="kJ/mol">0.0</scalar>
        </property>
        <property dictRef="me:rotConsts">

```



```

mesmer-input.txt
  <array units="cm-1">1.597738</array>
</property>
<property dictRef="me:symmetryNumber">
  <scalar>2</scalar>
</property>
<property dictRef="me:frequenciesScaleFactor">
  <scalar>0.974</scalar>
</property>
<property dictRef="me:vibFreqs">
  <array units="cm-1">1770.2010</array>
</property>
<property dictRef="me:MW">
  <scalar units="amu">32</scalar>
</property>
<property dictRef="me:spinMultiplicity">
  <scalar>3</scalar>
</property>
</propertyList>
<me:DOSCMethod>ClassicalRotors</me:DOSCMethod>
</molecule>
<molecule id="R200" description="R00">
<atomArray>
<atom id="a1" elementType="C" x3="-3.001113" y3="0.007075" z3="-0.136351"/>
<atom id="a2" elementType="H" x3="-3.742364" y3="0.757078" z3="0.136000"/>
<atom id="a3" elementType="H" x3="-3.239661" y3="-0.922953" z3="0.377072"/>
<atom id="a4" elementType="H" x3="-3.061103" y3="-0.165124" z3="-1.209729"/>
<atom id="a5" elementType="C" x3="1.426332" y3="-1.540335" z3="-0.079832"/>
<atom id="a6" elementType="H" x3="1.384326" y3="-1.705879" z3="-1.154851"/>
<atom id="a7" elementType="H" x3="2.460233" y3="-1.392030" z3="0.223036"/>
<atom id="a8" elementType="H" x3="1.020195" y3="-2.412006" z3="0.427726"/>
<atom id="a9" elementType="O" x3="-0.689584" y3="-0.521029" z3="-0.155260"/>
<atom id="a10" elementType="C" x3="-1.618296" y3="0.484064" z3="0.239414"/>
<atom id="a11" elementType="H" x3="-1.377295" y3="1.423935" z3="-0.262340"/>
<atom id="a12" elementType="H" x3="-1.530183" y3="0.649524" z3="1.318176"/>
<atom id="a13" elementType="C" x3="0.601033" y3="-0.333135" z3="0.270254"/>
<atom id="a14" elementType="H" x3="0.646392" y3="-0.048026" z3="1.325648"/>
<atom id="a15" elementType="O" x3="1.193274" y3="0.794453" z3="-0.444847"/>
<atom id="a16" elementType="O" spinMultiplicity="2" x3="1.023183"
y3="1.914821" z3="0.187240"/>
</atomArray>
<bondArray>
<bond atomRefs2="a4 a1" order="1"/>
<bond atomRefs2="a6 a5" order="1"/>
<bond atomRefs2="a15 a16" order="1"/>
<bond id="b1" atomRefs2="a15 a13" order="1"/>
<bond atomRefs2="a11 a10" order="1"/>
<bond atomRefs2="a9 a10" order="1"/>
<bond atomRefs2="a9 a13" order="1"/>
<bond atomRefs2="a1 a2" order="1"/>
<bond atomRefs2="a1 a10" order="1"/>
<bond atomRefs2="a1 a3" order="1"/>
<bond atomRefs2="a5 a7" order="1"/>
<bond atomRefs2="a5 a13" order="1"/>
<bond atomRefs2="a5 a8" order="1"/>
<bond atomRefs2="a10 a12" order="1"/>
<bond atomRefs2="a13 a14" order="1"/>

```

```
</bondArray>
  <propertyList>
    <property dictRef="me:ZPE">
      <scalar units="kJ/mol"> -157.6</scalar>
    </property>
    <property dictRef="me:rotConsts">
      <array units="cm-1">
        0.128780
        0.061499
        0.044368
      </array>
    </property>
    <property dictRef="me:symmetryNumber">
      <scalar>1</scalar>
    </property>
    <property dictRef="me:frequenciesScaleFactor">
      <scalar>0.974</scalar>
    </property>
    <property dictRef="me:vibFreqs">
      <array units="cm-1">
        71.7301
        121.2364
        187.5063
        193.7338
        244.2257
        309.8345
        383.5848
        434.3606
        564.6068
        573.5548
        825.5156
        838.4426
        883.1230
        978.9133
        1082.0757
        1111.4718
        1149.1391
        1183.4632
        1196.4912
        1232.5739
        1302.3129
        1314.6608
        1367.8583
        1384.5968
        1410.1447
        1424.9672
        1459.7787
        1484.7027
        1487.3435
        1493.8855
        1506.9663
        1531.6426
        3039.0902
        3060.0719
        3069.8457
        3087.2472
      </array>
    </property>
  </propertyList>
</bondArray>
```

3090.4208  
 3136.3489  
 3143.0042  
 3155.2943  
 3157.8574

```

</array>
</property>
<property dictRef="me:MW">
  <scalar units="amu">105.05517</scalar>
</property>
<property dictRef="me:spinMultiplicity">
  <scalar>2</scalar>
</property>
<property dictRef="me:eletronicExcitation">
  <array units="cm-1">0</array>
</property>
<property dictRef="me:epsilon">
  <scalar>504.0</scalar>
</property>
<property dictRef="me:sigma">
  <scalar>6.2</scalar>
</property>
</propertyList>
<me:energyTransferModel xsi:type="me:ExponentialDown">
  <me:deltaEDown units="cm-1">250.0</me:deltaEDown>
</me:energyTransferModel>
<me:DOSCMMethod name="ClassicalRotors"/>
<me:ExtraDOSCMMethod xsi:type="me:HinderedRotorQMID">
  <me:bondRef>b1</me:bondRef>
  <me:HinderedRotorPotential format="numerical" units="kJ/mol"
expansionSize="7" scale="1" UseSineTerms="yes">
    <me:PotentialPoint angle="0.0" potential="12.6805" />
    <me:PotentialPoint angle="10.0" potential="12.8228" />
    <me:PotentialPoint angle="20.0" potential="12.3150" />
    <me:PotentialPoint angle="30.0" potential="11.4466" />
    <me:PotentialPoint angle="40.0" potential="9.8321" />
    <me:PotentialPoint angle="50.0" potential="7.8070" />
    <me:PotentialPoint angle="60.0" potential="5.2436" />
    <me:PotentialPoint angle="70.0" potential="2.7537" />
    <me:PotentialPoint angle="80.0" potential="0.8374" />
    <me:PotentialPoint angle="90.0" potential="0.0" />
    <me:PotentialPoint angle="100.0" potential="0.3168" />
    <me:PotentialPoint angle="110.0" potential="1.2399" />
    <me:PotentialPoint angle="120.0" potential="2.0936" />
    <me:PotentialPoint angle="130.0" potential="2.3845" />
    <me:PotentialPoint angle="140.0" potential="2.1384" />
    <me:PotentialPoint angle="150.0" potential="1.4814" />
    <me:PotentialPoint angle="160.0" potential="0.9826" />
    <me:PotentialPoint angle="170.0" potential="1.2000" />
    <me:PotentialPoint angle="180.0" potential="2.6365" />
    <me:PotentialPoint angle="190.0" potential="5.057" />
    <me:PotentialPoint angle="200.0" potential="7.7447" />
    <me:PotentialPoint angle="210.0" potential="10.098" />
    <me:PotentialPoint angle="220.0" potential="11.7244" />
    <me:PotentialPoint angle="230.0" potential="12.5258" />
    <me:PotentialPoint angle="240.0" potential="12.424" />
  </me:HinderedRotorPotential>
</me:ExtraDOSCMMethod>

```

```

mesmer-input.txt
  <me:PotentialPoint angle= "250.0" potential= "11.4274" />
  <me:PotentialPoint angle= "260.0" potential= "9.8465" />
  <me:PotentialPoint angle= "270.0" potential= "7.6938" />
  <me:PotentialPoint angle= "280.0" potential= "5.6746" />
  <me:PotentialPoint angle= "290.0" potential= "4.1706" />
  <me:PotentialPoint angle= "300.0" potential= "3.5347" />
  <me:PotentialPoint angle= "310.0" potential= "4.1744" />
  <me:PotentialPoint angle= "320.0" potential= "5.9037" />
  <me:PotentialPoint angle= "330.0" potential= "8.1314" />
  <me:PotentialPoint angle= "340.0" potential= "10.2886" />
  <me:PotentialPoint angle= "350.0" potential= "13.3123" />
  <me:PotentialPoint angle= "360.0" potential= "12.6805" />
</me:HinderedRotorPotential>
  <me:periodicity>1</me:periodicity>
</me:ExtraDOSMethod>
</molecule>
<molecule id="Q200H">
  <propertyList>
    <property dictRef="me:ZPE">
      <scalar units="kJ/mol">-120.4</scalar>
    </property>
    <property dictRef="me:rotConsts">
      <array units="cm-1">
        0.125404
        0.062641
        0.044540
      </array>
    </property>
    <property dictRef="me:symmetryNumber">
      <scalar>1</scalar>
    </property>
    <property dictRef="me:frequenciesScaleFactor">
      <scalar>0.974</scalar>
    </property>
    <property dictRef="me:vibFreqs">
      <array units="cm-1">
        86.4410
        108.9853
        162.4969
        193.9082
        202.7631
        214.5025
        295.5356
        376.3687
        387.0963
        437.5673
        562.4603
        612.1208
        647.5250
        878.2801
        907.4239
        992.2094
        1030.4092
        1058.6802
        1131.3668
        1138.2802
      </array>
    </property>
  </propertyList>
</molecule>

```

mesmer-input.txt

```
1179.1487
1203.8063
1263.5924
1374.1457
1375.0821
1404.1305
1425.3855
1445.4602
1457.1092
1471.8306
1488.0610
1493.7136
1498.1220
3004.1078
3072.9646
3084.9000
3088.2110
3137.6858
3156.4185
3162.9007
3172.1269
3772.5353
</array>
</property>
<property dictRef="me:MW">
  <scalar units="amu">105.05517</scalar>
</property>
<property dictRef="me:spinMultiplicity">
  <scalar>2</scalar>
</property>
<property dictRef="me:epsilon">
  <scalar>504.0</scalar>
</property>
<property dictRef="me:sigma">
  <scalar>6.2</scalar>
</property>
</propertyList>
<me:energyTransferModel xsi:type="me:ExponentialDown">
  <me:deltaEDown units="cm-1">250.0</me:deltaEDown>
</me:energyTransferModel>
<me:DOSCMETHOD>ClassicalRotors</me:DOSCMETHOD>
</molecule>
<molecule id="TS_H_shift">
  <propertyList>
    <property dictRef="me:ZPE">
      <scalar units="kJ/mol">-82.5</scalar>
    </property>
    <property dictRef="me:rotConsts">
      <array units="cm-1">
        0.135017
        0.068153
        0.049538
      </array>
    </property>
    <property dictRef="me:symmetryNumber">
      <scalar>1</scalar>

```

mesmer-input.txt

```
</property>
<property dictRef="me:frequenciesScaleFactor">
  <scalar>0.974</scalar>
</property>
<property dictRef="me:vibFreqs">
  <array units="cm-1">
    126.7410
    178.5226
    211.7029
    216.9508
    287.2305
    321.7896
    419.1738
    473.0825
    502.3432
    572.9773
    633.3922
    860.1020
    882.7649
    901.1426
    977.1351
    1083.4926
    1112.3210
    1141.8928
    1156.2423
    1174.7304
    1197.7811
    1230.4898
    1288.3172
    1358.3962
    1381.3022
    1400.0735
    1423.1998
    1450.3595
    1485.8031
    1490.9374
    1493.1370
    1496.3652
    1660.9617
    3052.5649
    3067.9138
    3076.2126
    3082.2962
    3123.4977
    3154.3583
    3160.6567
    3164.5471
  </array>
</property>
<property dictRef="me:MW">
  <scalar units="amu">105.05517</scalar>
</property>
<property dictRef="me:spinMultiplicity">
  <scalar>2</scalar>
</property>
<property dictRef="me:imFreqs">
```

```

                                mesmer-input.txt
      <scalar units="cm-1">1848.6033</scalar>
    </property>
  </propertyList>
  <me:DOSCMethod>ClassicalRotors</me:DOSCMethod>
</molecule>
<molecule id="00Q200H">
  <propertyList>
    <property dictRef="me:ZPE">
      <scalar units="kJ/mol">-250</scalar>
    </property>
    <property dictRef="me:rotConsts">
      <array units="cm-1">
0.157444374
0.070631983
0.054923849
      </array>
    </property>
    <property dictRef="me:symmetryNumber">
      <scalar>1</scalar>
    </property>
    <property dictRef="me:frequenciesScaleFactor">
      <scalar>0.974</scalar>
    </property>
    <property dictRef="me:vibFreqs">
      <array units="cm-1">
81.9261
105.0616
155.0602
226.9255
314.251
372.3583
424.2656
456.0055
528.59
682.9059
963.6882
981.4374
1018.727
1106.512
1134.017
1184.574
1234.109
1289.467
1314.044
1330.885
1411.263
1439.189
1462.25
1490.188
1517.613
3090.145
3096.316
3170.854
3180.728
3779.973
      </array>
    </property>
  </propertyList>
</molecule>

```

mesmer-input.txt

```
</property>
<property dictRef="me:MW">
  <scalar units="amu">109</scalar>
</property>
<property dictRef="me:spinMultiplicity">
  <scalar>2</scalar>
</property>
</propertyList>
<me:DOSCMETHOD>ClassicalRotors</me:DOSCMETHOD>
</molecule>
<molecule id="N2">
  <atom elementType="N2" />
  <propertyList>
    <property dictRef="me:epsilon">
      <scalar>48.0</scalar>
    </property>
    <property dictRef="me:sigma">
      <scalar>3.9</scalar>
    </property>
    <property dictRef="me:MW">
      <scalar units="amu">28.0</scalar>
    </property>
  </propertyList>
</molecule>
</moleculeList>
<reactionList>
  <reaction id="H_shift" reversible="true">
    <reactant>
      <molecule ref="R200" role="modelled" />
    </reactant>
    <product>
      <molecule ref="Q200H" role="modelled" />
    </product>
    <me:transitionState>
      <molecule ref="TS_H_shift" role="transitionState" />
    </me:transitionState>
    <me:tunneling name="Eckart"/>
    <me:MCRCMethod name="SimpleRRKM"/>
  </reaction>
  <reaction id="Q200H_02">
    <reactant>
      <molecule ref="Q200H" role="modelled" />
    </reactant>
    <reactant>
      <molecule ref="O2" role="excessReactant" />
    </reactant>
    <product>
      <molecule ref="OOQ200H" role="sink" />
    </product>
    <me:MCRCMethod name="SimpleBimolecularSink"/>
  </reaction>
</reactionList>
<me:BimolecularLossRateCoefficient>6.00e-12</me:BimolecularLossRateCoefficient>
  <me:excessReactantConc>5E18</me:excessReactantConc>
</reaction>
</reactionList>
<me:conditions>
```



mesmer-input.txt

```
<me:bathGas>N2</me:bathGas>
<me:PTs>
  <me:PTpair units="Torr" P="760.0" T="253.0" />
  <me:PTpair units="Torr" P="760.0" T="243.0" />
  <me:PTpair units="Torr" P="760.0" T="233.0" />
</me:PTs>
<me:InitialPopulation>
  <me:molecule ref="R200" population="1.0" />
</me:InitialPopulation>
</me:conditions>
<me:modelParameters>
  <!--Specify grain size directly...-->
  <me:grainSize units="cm-1">50</me:grainSize>
  <!--...or by the total number of grains
  <me:numberOfGrains> 500 </me:numberOfGrains>-->
  <!--Specify increased energy range
  <me:maxTemperature>6000</me:maxTemperature>-->
  <me:energyAboveTheTopHill>30.0</me:energyAboveTheTopHill>
  <me:automaticallySetMaxEne>1.0e-09</me:automaticallySetMaxEne>
</me:modelParameters>
<me:control>
  <me:printSpeciesProfile />
  <me:testRateConstants />
  <me:eigenvalues>10</me:eigenvalues>
</me:control>
</me:mesmer>
```

\*\*\*\*\* CH3CH(OO)OCH(OOH)CH3 #1

```
<?xml version="1.0" encoding="utf-8" ?>
<?xml-stylesheet type='text/xsl' href='../..mesmer2.xsl' media='other' ?>
<?xml-stylesheet type='text/xsl' href='../..mesmer1.xsl' media='screen' ?>
<me:mesmer xmlns="http://www.xml-cml.org/schema"
xmlns:me="http://www.chem.leeds.ac.uk/mesmer"
xmlns:xsi="http://www.w3.org/2001/XMLSchema-instance">
  <me:title>H-Shift in CH3CH(OOH)OCH(OO)CH3</me:title>
  <moleculeList>
    <molecule id="Q200">
      <propertyList>
        <property dictRef="me:ZPE">
          <scalar units="kJ/mol">0.0</scalar>
        </property>
        <property dictRef="me:rotConsts">
          <array units="cm-1">
            0.072562
            0.041388
            0.030294
          </array>
        </property>
        <property dictRef="me:symmetryNumber">
          <scalar>1</scalar>
        </property>
        <property dictRef="me:frequenciesScaleFactor">
          <scalar>0.974</scalar>
        </property>
      </propertyList>
    </molecule>
  </moleculeList>
</me:mesmer>
```

mesmer-input.txt

```
<property dictRef="me:vibFreqs">
  <array units="cm-1">
    61.3285
    66.1563
    138.5893
    163.1465
    200.1488
    213.0966
    216.2125
    281.1213
    297.7229
    328.0291
    372.8364
    421.9599
    506.9125
    553.6286
    582.9660
    644.4987
    842.3787
    878.4184
    921.6195
    996.7873
    1055.4422
    1090.7816
    1143.9527
    1145.6195
    1181.8326
    1217.6162
    1226.3336
    1308.6640
    1362.5830
    1363.6281
    1384.9361
    1418.1962
    1422.8691
    1431.7546
    1464.4158
    1490.2161
    1490.8329
    1495.8729
    1498.5222
    3079.2633
    3079.7644
    3106.1934
    3114.9029
    3163.7431
    3164.0615
    3166.6305
    3169.5862
    3829.0399
  </array>
</property>
<property dictRef="me:MW">
  <scalar units="amu">137.04500</scalar>
</property>
<property dictRef="me:spinMultiplicity">
```

mesmer-input.txt

```
<scalar>2</scalar>
</property>
<property dictRef="me:epsilon">
  <scalar>600.0</scalar>
</property>
<property dictRef="me:sigma">
  <scalar>6.5</scalar>
</property>
</propertyList>
<me:energyTransferModel xsi:type="me:ExponentialDown">
  <me:deltaEDown units="cm-1">250.0</me:deltaEDown>
</me:energyTransferModel>
<me:DOSCMETHOD>ClassicalRotors</me:DOSCMETHOD>
</molecule>
<molecule id="TS_H_shift1">
  <propertyList>
    <property dictRef="me:ZPE">
      <scalar units="kJ/mol">76.7</scalar>
    </property>
    <property dictRef="me:rotConsts">
      <array units="cm-1">
        0.084459
        0.039141
        0.034560
      </array>
    </property>
    <property dictRef="me:symmetryNumber">
      <scalar>1</scalar>
    </property>
    <property dictRef="me:frequenciesScaleFactor">
      <scalar>0.974</scalar>
    </property>
    <property dictRef="me:vibFreqs">
      <array units="cm-1">
        81.7345
        122.1289
        163.5712
        211.8687
        213.5723
        242.2601
        302.7320
        315.3763
        337.2521
        379.2539
        439.2531
        444.7995
        547.0995
        567.8891
        621.4907
        669.4377
        873.7360
        903.6221
        924.0003
        1009.3175
        1061.2773
        1074.1225
      </array>
    </property>
  </propertyList>
</molecule>
```

```
1104.9079
1131.5732
1162.3505
1188.7396
1237.3200
1302.2385
1319.9990
1385.2973
1393.5731
1411.1674
1444.3133
1447.5203
1483.9622
1488.7422
1489.4446
1498.6554
1656.2248
3056.9781
3081.1373
3125.1529
3142.3065
3165.1967
3170.5930
3180.3615
3784.7279
</array>
</property>
<property dictRef="me:MW">
  <scalar units="amu">137.04500</scalar>
</property>
<property dictRef="me:spinMultiplicity">
  <scalar>2</scalar>
</property>
<property dictRef="me:imFreqs">
  <scalar units="cm-1">1799.1578</scalar>
</property>
</propertyList>
<me:DOSCMethod>ClassicalRotors</me:DOSCMethod>
</molecule>
<molecule id="TS_H_shift2">
  <propertyList>
    <property dictRef="me:ZPE">
      <scalar units="kJ/mol">79.5</scalar>
    </property>
    <property dictRef="me:rotConsts">
      <array units="cm-1">
        0.072372
        0.040848
        0.038706
      </array>
    </property>
    <property dictRef="me:symmetryNumber">
      <scalar>1</scalar>
    </property>
    <property dictRef="me:frequenciesScaleFactor">
      <scalar>0.974</scalar>

```

mesmer-input.txt

```
</property>
<property dictRef="me:vibFreqs">
  <array units="cm-1">
    90.4189
    91.9808
    170.6601
    189.6532
    221.4629
    247.6567
    249.1933
    277.9175
    313.5042
    379.5250
    404.6801
    480.4192
    556.9841
    561.7434
    606.9626
    684.5332
    868.7816
    902.5095
    930.7396
    982.8989
    1054.9003
    1072.1275
    1102.7393
    1132.3998
    1159.8253
    1188.0102
    1199.1080
    1240.2886
    1270.5432
    1384.4133
    1391.6581
    1410.5368
    1432.5497
    1441.2263
    1486.6613
    1488.1238
    1494.3665
    1498.1785
    1683.2745
    3062.4874
    3080.6745
    3125.9381
    3141.2057
    3162.9165
    3170.0422
    3173.2205
    3808.9905
  </array>
</property>
<property dictRef="me:MW">
  <scalar units="amu">137.04500</scalar>
</property>
<property dictRef="me:spinMultiplicity">
```

mesmer-input.txt

```
<scalar>2</scalar>
</property>
<property dictRef="me:imFreqs">
  <scalar units="cm-1">1877.94</scalar>
</property>
</propertyList>
<me:DOSCMethod>ClassicalRotors</me:DOSCMethod>
</molecule>
<molecule id="Product">
  <propertyList>
    <property dictRef="me:ZPE">
      <scalar units="kJ/mol">43.9</scalar>
    </property>
    <property dictRef="me:rotConsts">
      <array units="cm-1">
        0.072562
        0.041388
        0.030294
      </array>
    </property>
    <property dictRef="me:symmetryNumber">
      <scalar>1</scalar>
    </property>
    <property dictRef="me:frequenciesScaleFactor">
      <scalar>0.974</scalar>
    </property>
    <property dictRef="me:vibFreqs">
      <array units="cm-1">
        61.3285
        66.1563
        138.5893
        163.1465
        200.1488
        213.0966
        216.2125
        281.1213
        297.7229
        328.0291
        372.8364
        421.9599
        506.9125
        553.6286
        582.9660
        644.4987
        842.3787
        878.4184
        921.6195
        996.7873
        1055.4422
        1090.7816
        1143.9527
        1145.6195
        1181.8326
        1217.6162
        1226.3336
        1308.6640
      </array>
    </property>
  </propertyList>
</molecule>
```

```
1362.5830
1363.6281
1384.9361
1418.1962
1422.8691
1431.7546
1464.4158
1490.2161
1490.8329
1495.8729
1498.5222
3079.2633
3079.7644
3106.1934
3114.9029
3163.7431
3164.0615
3166.6305
3169.5862
3829.0399
</array>
</property>
<property dictRef="me:MW">
  <scalar units="amu">137.04500</scalar>
</property>
<property dictRef="me:spinMultiplicity">
  <scalar>2</scalar>
</property>
</propertyList>
<me:DOSCMETHOD>ClassicalRotors</me:DOSCMETHOD>
</molecule>
<molecule id="N2">
  <atom elementType="N2" />
  <propertyList>
    <property dictRef="me:epsilon">
      <scalar>48.0</scalar>
    </property>
    <property dictRef="me:sigma">
      <scalar>3.9</scalar>
    </property>
    <property dictRef="me:MW">
      <scalar units="amu">28.0</scalar>
    </property>
  </propertyList>
</molecule>
</moleculeList>
<reactionList>
  <reaction id="H_shift2">
    <reactant>
      <molecule ref="Q200" role="modelled" />
    </reactant>
    <product>
      <molecule ref="Product" role="sink" />
    </product>
    <me:transitionState>
      <molecule ref="TS_H_shift2" role="transitionState" />
```

mesmer-input.txt

```
</me:transitionState>
  <me:tunneling name="Eckart"/>
  <me:MCRCMethod name="SimpleRRKM"/>
</reaction>
<reaction id="H_shift1">
  <reactant>
    <molecule ref="Q200" role="modelled" />
  </reactant>
  <product>
    <molecule ref="Product" role="sink" />
  </product>
  <me:transitionState>
    <molecule ref="TS_H_shift1" role="transitionState" />
  </me:transitionState>
  <me:tunneling name="Eckart"/>
  <me:MCRCMethod name="SimpleRRKM"/>
</reaction>
</reactionList>
<me:conditions>
  <me:bathGas>N2</me:bathGas>
  <me:PTs>
    <me:PTpair units="Torr" P="760.0" T="233.0" />
    <me:PTpair units="Torr" P="760.0" T="243.0" />
    <me:PTpair units="Torr" P="760.0" T="253.0" />
    <me:PTpair units="Torr" P="760.0" T="263.0" />
    <me:PTpair units="Torr" P="760.0" T="273.0" />
    <me:PTpair units="Torr" P="760.0" T="283.0" />
    <me:PTpair units="Torr" P="760.0" T="293.0" />
    <me:PTpair units="Torr" P="760.0" T="298.0" />
    <me:PTpair units="Torr" P="760.0" T="303.0" />
    <me:PTpair units="Torr" P="760.0" T="313.0" />
    <me:PTpair units="Torr" P="760.0" T="323.0" />
    <me:PTpair units="Torr" P="760.0" T="333.0" />
    <me:PTpair units="Torr" P="760.0" T="343.0" />
  </me:PTs>
  <me:InitialPopulation>
    <me:molecule ref="Q200" population="1.0" />
  </me:InitialPopulation>
</me:conditions>
<me:modelParameters>
  <!--Specify grain size directly...-->
  <me:grainSize units="cm-1">50</me:grainSize>
  <!--...or by the total number of grains
    <me:numberOfGrains> 500 </me:numberOfGrains>-->
  <!--Specify increased energy range
    <me:maxTemperature>6000</me:maxTemperature>-->
  <me:energyAboveTheTopHill>30.0</me:energyAboveTheTopHill>
  <me:automaticallySetMaxEne>1.0e-09</me:automaticallySetMaxEne>
</me:modelParameters>
<me:control>
  <me:printSpeciesProfile />
  <me:testRateConstants />
  <me:eigenvalues>10</me:eigenvalues>
</me:control>
</me:mesmer>
```



\*\*\*\*\* CH3CH(0)OCH(00H)CH3 #1

```

<?xml version="1.0" encoding="utf-8" ?>
<?xml-stylesheet type='text/xsl' href='../..//mesmer2.xsl' media='other' ?>
<?xml-stylesheet type='text/xsl' href='../..//mesmer1.xsl' media='screen' ?>
<me:mesmer xmlns="http://www.xml-cml.org/schema"
xmlns:me="http://www.chem.leeds.ac.uk/mesmer"
xmlns:xsi="http://www.w3.org/2001/XMLSchema-instance">
  <me:title>CH3CH(00H)OCH(0)(CH3) C1 H-Shift and CH3-Elimination</me:title>
  <moleculeList>
    <molecule id="OQ200H">
      <propertyList>
        <property dictRef="me:ZPE">
          <scalar units="kJ/mol">0.0</scalar>
        </property>
        <property dictRef="me:rotConsts">
          <array units="cm-1">
            0.113080
            0.051536
            0.040002
          </array>
        </property>
        <property dictRef="me:symmetryNumber">
          <scalar>1</scalar>
        </property>
        <property dictRef="me:frequenciesScaleFactor">
          <scalar>0.974</scalar>
        </property>
        <property dictRef="me:vibFreqs">
          <array units="cm-1">
            81.3213
            147.7321
            186.0401
            190.0578
            224.2439
            233.0967
            291.8222
            337.5275
            412.4554
            419.9181
            504.4320
            541.0542
            628.9819
            726.7534
            855.5154
            896.8939
            928.9691
            972.8170
            1012.8381
            1056.5388
            1085.9773
            1136.7872
            1161.8127
            1168.6588
            1212.8959
          </array>
        </property>
      </propertyList>
    </molecule>
  </moleculeList>
</me:mesmer>

```

```
1225.2796
1334.4671
1385.4392
1389.4599
1405.1890
1432.8877
1476.8513
1485.9388
1487.7974
1495.3575
1498.3543
2974.7223
3053.1704
3080.2774
3080.4371
3159.5888
3169.1143
3172.6291
3177.6779
3757.5588
</array>
</property>
<property dictRef="me:MW">
  <scalar units="amu">121.05008</scalar>
</property>
<property dictRef="me:spinMultiplicity">
  <scalar>2</scalar>
</property>
<property dictRef="me:epsilon">
  <scalar>600.0</scalar>
</property>
<property dictRef="me:sigma">
  <scalar>6.2</scalar>
</property>
</propertyList>
<me:energyTransferModel xsi:type="me:ExponentialDown">
  <me:deltaEDown units="cm-1">250.0</me:deltaEDown>
</me:energyTransferModel>
<me:DOSCMethod>ClassicalRotors</me:DOSCMethod>
</molecule>
<molecule id="P1D">
  <propertyList>
    <property dictRef="me:ZPE">
      <scalar units="kJ/mol">-40.0</scalar>
    </property>
    <property dictRef="me:rotConsts">
      <array units="cm-1">
        0.113080
        0.051536
        0.040002
      </array>
    </property>
    <property dictRef="me:symmetryNumber">
      <scalar>1</scalar>
    </property>
    <property dictRef="me:frequenciesScaleFactor">
```

mesmer-input.txt

```
<scalar>0.974</scalar>
</property>
<property dictRef="me:vibFreqs">
  <array units="cm-1">
    81.3213
    147.7321
    186.0401
    190.0578
    224.2439
    233.0967
    291.8222
    337.5275
    412.4554
    419.9181
    504.4320
    541.0542
    628.9819
    726.7534
    855.5154
    896.8939
    928.9691
    972.8170
    1012.8381
    1056.5388
    1085.9773
    1136.7872
    1161.8127
    1168.6588
    1212.8959
    1225.2796
    1334.4671
    1385.4392
    1389.4599
    1405.1890
    1432.8877
    1476.8513
    1485.9388
    1487.7974
    1495.3575
    1498.3543
    2974.7223
    3053.1704
    3080.2774
    3080.4371
    3159.5888
    3169.1143
    3172.6291
    3177.6779
    3757.5588
  </array>
</property>
<property dictRef="me:MW">
  <scalar units="amu">121.05008</scalar>
</property>
<property dictRef="me:spinMultiplicity">
  <scalar>2</scalar>
```

mesmer-input.txt

```
</property>
<property dictRef="me:epsilon">
  <scalar>600.0</scalar>
</property>
<property dictRef="me:sigma">
  <scalar>6.2</scalar>
</property>
</propertyList>
<me:energyTransferModel xsi:type="me:ExponentialDown">
  <me:deltaEDown units="cm-1">250.0</me:deltaEDown>
</me:energyTransferModel>
<me:DOSCMethod>ClassicalRotors</me:DOSCMethod>
</molecule>
<molecule id="PIH">
  <propertyList>
    <property dictRef="me:ZPE">
      <scalar units="kJ/mol">-40.0</scalar>
    </property>
    <property dictRef="me:rotConsts">
      <array units="cm-1">
        0.113080
        0.051536
        0.040002
      </array>
    </property>
    <property dictRef="me:symmetryNumber">
      <scalar>1</scalar>
    </property>
    <property dictRef="me:frequenciesScaleFactor">
      <scalar>0.974</scalar>
    </property>
    <property dictRef="me:vibFreqs">
      <array units="cm-1">
        81.3213
        147.7321
        186.0401
        190.0578
        224.2439
        233.0967
        291.8222
        337.5275
        412.4554
        419.9181
        504.4320
        541.0542
        628.9819
        726.7534
        855.5154
        896.8939
        928.9691
        972.8170
        1012.8381
        1056.5388
        1085.9773
        1136.7872
        1161.8127
```

```
1168.6588
1212.8959
1225.2796
1334.4671
1385.4392
1389.4599
1405.1890
1432.8877
1476.8513
1485.9388
1487.7974
1495.3575
1498.3543
2974.7223
3053.1704
3080.2774
3080.4371
3159.5888
3169.1143
3172.6291
3177.6779
3757.5588
</array>
</property>
<property dictRef="me:MW">
  <scalar units="amu">121.05008</scalar>
</property>
<property dictRef="me:spinMultiplicity">
  <scalar>2</scalar>
</property>
<property dictRef="me:epsilon">
  <scalar>600.0</scalar>
</property>
<property dictRef="me:sigma">
  <scalar>6.2</scalar>
</property>
</propertyList>
<me:energyTransferModel xsi:type="me:ExponentialDown">
  <me:deltaEDown units="cm-1">250.0</me:deltaEDown>
</me:energyTransferModel>
<me:DOSCMETHOD>ClassicalRotors</me:DOSCMETHOD>
</molecule>
<molecule id="TS_H">
  <propertyList>
    <property dictRef="me:ZPE">
      <scalar units="kJ/mol">31.3</scalar>
    </property>
    <property dictRef="me:rotConsts">
      <array units="cm-1">
        0.103762
        0.057050
        0.039298
      </array>
    </property>
    <property dictRef="me:symmetryNumber">
      <scalar>1</scalar>

```

mesmer-input.txt

```
</property>
<property dictRef="me:frequenciesScaleFactor">
  <scalar>0.974</scalar>
</property>
<property dictRef="me:vibFreqs">
  <array units="cm-1">
    123.2821
    168.6102
    205.5729
    215.1742
    229.9967
    305.4945
    347.8756
    371.0267
    430.4654
    552.3735
    574.1671
    606.8662
    677.7788
    865.1350
    887.8024
    920.5906
    974.0203
    1083.9661
    1099.2949
    1115.1611
    1131.2427
    1171.6691
    1183.9540
    1209.9377
    1271.0029
    1317.2085
    1355.2605
    1379.8458
    1396.7917
    1412.0251
    1443.4429
    1478.4761
    1491.3376
    1493.9695
    1497.3249
    1579.6098
    3008.9314
    3060.1197
    3070.8561
    3077.4370
    3157.1792
    3160.6368
    3166.8324
    3167.2028
  </array>
</property>
<property dictRef="me:MW">
  <scalar units="amu">121.05008</scalar>
</property>
<property dictRef="me:spinMultiplicity">
```

mesmer-input.txt

```
    <scalar>2</scalar>
  </property>
  <property dictRef="me:imFreqs">
    <scalar units="cm-1">1975.92</scalar>
  </property>
</propertyList>
<me:DOSCMethod>ClassicalRotors</me:DOSCMethod>
</molecule>
<molecule id="TS_D">
  <propertyList>
    <property dictRef="me:ZPE">
      <scalar units="kJ/mol">36.5</scalar>
    </property>
    <property dictRef="me:rotConsts">
      <array units="cm-1">
        0.087820
        0.056876
        0.045403
      </array>
    </property>
    <property dictRef="me:symmetryNumber">
      <scalar>1</scalar>
    </property>
    <property dictRef="me:frequenciesScaleFactor">
      <scalar>0.974</scalar>
    </property>
    <property dictRef="me:vibFreqs">
      <array units="cm-1">
        80.7994
        118.1175
        179.4819
        190.3294
        226.4558
        242.3969
        272.8892
        345.0315
        365.7728
        422.5094
        524.6355
        561.1341
        599.9301
        684.6310
        716.6132
        811.6147
        872.8773
        901.9920
        971.9681
        1067.9722
        1100.2114
        1110.9142
        1148.4610
        1184.1465
        1199.3608
        1358.5062
        1375.8473
        1396.1828
      </array>
    </property>
  </propertyList>
</molecule>
```

mesmer-input.txt

```
1428.5742
1430.1119
1445.3732
1489.6167
1495.4406
1513.6317
1575.1015
3053.7983
3076.2663
3102.2217
3131.3146
3157.1305
3171.4552
3261.4565
3276.8868
3628.0965
</array>
</property>
<property dictRef="me:MW">
  <scalar units="amu">121.05008</scalar>
</property>
<property dictRef="me:spinMultiplicity">
  <scalar>2</scalar>
</property>
<property dictRef="me:imFreqs">
  <scalar units="cm-1">515.831</scalar>
</property>
</propertyList>
<me:DOSMethod>ClassicalRotors</me:DOSMethod>
</molecule>
<molecule id="N2">
  <atom elementType="N2" />
  <propertyList>
    <property dictRef="me:epsilon">
      <scalar>48.0</scalar>
    </property>
    <property dictRef="me:sigma">
      <scalar>3.9</scalar>
    </property>
    <property dictRef="me:MW">
      <scalar units="amu">28.0</scalar>
    </property>
  </propertyList>
</molecule>
</moleculeList>
<reactionList>
  <reaction id="Decomp">
    <reactant>
      <molecule ref="OQ200H" role="modelled" />
    </reactant>
    <product>
      <molecule ref="PID" role="sink" />
    </product>
    <me:transitionState>
      <molecule ref="TS_D" role="transitionState" />
    </me:transitionState>
  </reaction>
</reactionList>
```



```

mesmer-input.txt
  <me:tunneling name="Eckart"/>
  <me:MCRCMethod name="SimpleRRKM"/>
</reaction>
<reaction id="H_Shift">
  <reactant>
    <molecule ref="OQ200H" role="modelled" />
  </reactant>
  <product>
    <molecule ref="PIH" role="sink" />
  </product>
  <me:transitionState>
    <molecule ref="TS_H" role="transitionState" />
  </me:transitionState>
  <me:tunneling name="Eckart"/>
  <me:MCRCMethod name="SimpleRRKM"/>
</reaction>
</reactionList>
<me:conditions>
  <me:bathGas>N2</me:bathGas>
  <me:PTs>
    <me:PTpair units="Torr" P="760.0" T="233.0" />
    <me:PTpair units="Torr" P="760.0" T="243.0" />
    <me:PTpair units="Torr" P="760.0" T="253.0" />
    <me:PTpair units="Torr" P="760.0" T="263.0" />
    <me:PTpair units="Torr" P="760.0" T="273.0" />
    <me:PTpair units="Torr" P="760.0" T="283.0" />
    <me:PTpair units="Torr" P="760.0" T="293.0" />
    <me:PTpair units="Torr" P="760.0" T="298.15" />
    <me:PTpair units="Torr" P="760.0" T="303.0" />
    <me:PTpair units="Torr" P="760.0" T="313.0" />
    <me:PTpair units="Torr" P="760.0" T="323.0" />
    <me:PTpair units="Torr" P="760.0" T="333.0" />
    <me:PTpair units="Torr" P="760.0" T="343.0" />
  </me:PTs>
  <me:InitialPopulation>
    <me:molecule ref="OQ200H" population="1.0" />
  </me:InitialPopulation>
</me:conditions>
<me:modelParameters>
  <!--Specify grain size directly...-->
  <me:grainSize units="cm-1">50</me:grainSize>
  <!--...or by the total number of grains
    <me:numberOfGrains> 500 </me:numberOfGrains>-->
  <!--Specify increased energy range
    <me:maxTemperature>6000</me:maxTemperature>-->
  <me:energyAboveTheTopHill>30.0</me:energyAboveTheTopHill>
  <me:automaticallySetMaxEne>1.0e-09</me:automaticallySetMaxEne>
</me:modelParameters>
<me:control>
  <me:printSpeciesProfile />
  <me:testRateConstants />
  <me:eigenvalues>10</me:eigenvalues>
</me:control>
</me:mesmer>

```

mesmer-input.txt

\*\*\*\*\* CH3CH(O)OCH(O)CH3 #2

```
<?xml version="1.0" encoding="utf-8" ?>
<?xml-stylesheet type='text/xsl' href='../..//mesmer2.xsl' media='other'?>
<?xml-stylesheet type='text/xsl' href='../..//mesmer1.xsl' media='screen'?>
<me:mesmer xmlns="http://www.xml-cml.org/schema"
xmlns:me="http://www.chem.leeds.ac.uk/mesmer"
xmlns:xsi="http://www.w3.org/2001/XMLSchema-instance">
  <me:title>CH3CH(O)OCH(O)(CH3) C2 H-Shift and CH3-Elimination</me:title>
  <moleculeList>
    <molecule id="OQ200H">
      <propertyList>
        <property dictRef="me:ZPE">
          <scalar units="kJ/mol">0.0</scalar>
        </property>
        <property dictRef="me:rotConsts">
          <array units="cm-1">
            0.096161
            0.056844
            0.041315
          </array>
        </property>
        <property dictRef="me:symmetryNumber">
          <scalar>1</scalar>
        </property>
        <property dictRef="me:frequenciesScaleFactor">
          <scalar>0.974</scalar>
        </property>
        <property dictRef="me:vibFreqs">
          <array units="cm-1">
            71.5058
            122.6232
            178.2634
            196.6931
            216.5016
            227.7713
            293.7058
            355.6289
            369.6546
            438.0236
            487.0654
            548.3689
            589.5557
            707.0103
            844.1016
            897.0117
            921.2124
            950.8226
            1045.7560
            1057.0927
            1076.3442
            1132.9594
            1141.6248
            1170.1363
            1208.1227
            1224.7958
          </array>
        </property>
      </propertyList>
    </molecule>
  </moleculeList>
</me:mesmer>
```

```
1351.4963
1371.0123
1393.5908
1410.6766
1424.4650
1478.5961
1483.2646
1485.1582
1495.0714
1504.2906
2984.9587
3065.2043
3077.4483
3122.4968
3145.6872
3154.1806
3167.8936
3171.8257
3737.0407
</array>
</property>
<property dictRef="me:MW">
  <scalar units="amu">121.05008</scalar>
</property>
<property dictRef="me:spinMultiplicity">
  <scalar>2</scalar>
</property>
<property dictRef="me:epsilon">
  <scalar>600.0</scalar>
</property>
<property dictRef="me:sigma">
  <scalar>6.2</scalar>
</property>
</propertyList>
<me:energyTransferModel xsi:type="me:ExponentialDown">
  <me:deltaEDown units="cm-1">250.0</me:deltaEDown>
</me:energyTransferModel>
<me:DOSCMETHOD>ClassicalRotors</me:DOSCMETHOD>
</molecule>
<molecule id="P1D">
  <propertyList>
    <property dictRef="me:ZPE">
      <scalar units="kJ/mol">-40.0</scalar>
    </property>
    <property dictRef="me:rotConsts">
      <array units="cm-1">
        0.113080
        0.051536
        0.040002
      </array>
    </property>
    <property dictRef="me:symmetryNumber">
      <scalar>1</scalar>
    </property>
    <property dictRef="me:frequenciesScaleFactor">
      <scalar>0.974</scalar>

```

```
</property>
<property dictRef="me:vibFreqs">
  <array units="cm-1">
    81.3213
    147.7321
    186.0401
    190.0578
    224.2439
    233.0967
    291.8222
    337.5275
    412.4554
    419.9181
    504.4320
    541.0542
    628.9819
    726.7534
    855.5154
    896.8939
    928.9691
    972.8170
    1012.8381
    1056.5388
    1085.9773
    1136.7872
    1161.8127
    1168.6588
    1212.8959
    1225.2796
    1334.4671
    1385.4392
    1389.4599
    1405.1890
    1432.8877
    1476.8513
    1485.9388
    1487.7974
    1495.3575
    1498.3543
    2974.7223
    3053.1704
    3080.2774
    3080.4371
    3159.5888
    3169.1143
    3172.6291
    3177.6779
    3757.5588
  </array>
</property>
<property dictRef="me:MW">
  <scalar units="amu">121.05008</scalar>
</property>
<property dictRef="me:spinMultiplicity">
  <scalar>2</scalar>
</property>
```

```

mesmer-input.txt
<property dictRef="me:epsilon">
  <scalar>600.0</scalar>
</property>
<property dictRef="me:sigma">
  <scalar>6.2</scalar>
</property>
</propertyList>
<me:energyTransferModel xsi:type="me:ExponentialDown">
  <me:deltaEDown units="cm-1">250.0</me:deltaEDown>
</me:energyTransferModel>
<me:DOSCMethod>ClassicalRotors</me:DOSCMethod>
</molecule>
<molecule id="PIH">
  <propertyList>
    <property dictRef="me:ZPE">
      <scalar units="kJ/mol">-40.0</scalar>
    </property>
    <property dictRef="me:rotConsts">
      <array units="cm-1">
        0.113080
        0.051536
        0.040002
      </array>
    </property>
    <property dictRef="me:symmetryNumber">
      <scalar>1</scalar>
    </property>
    <property dictRef="me:frequenciesScaleFactor">
      <scalar>0.974</scalar>
    </property>
    <property dictRef="me:vibFreqs">
      <array units="cm-1">
        81.3213
        147.7321
        186.0401
        190.0578
        224.2439
        233.0967
        291.8222
        337.5275
        412.4554
        419.9181
        504.4320
        541.0542
        628.9819
        726.7534
        855.5154
        896.8939
        928.9691
        972.8170
        1012.8381
        1056.5388
        1085.9773
        1136.7872
        1161.8127
        1168.6588
      </array>
    </property>
  </propertyList>
</molecule>

```

mesmer-input.txt

```
1212.8959
1225.2796
1334.4671
1385.4392
1389.4599
1405.1890
1432.8877
1476.8513
1485.9388
1487.7974
1495.3575
1498.3543
2974.7223
3053.1704
3080.2774
3080.4371
3159.5888
3169.1143
3172.6291
3177.6779
3757.5588
</array>
</property>
<property dictRef="me:MW">
  <scalar units="amu">121.05008</scalar>
</property>
<property dictRef="me:spinMultiplicity">
  <scalar>2</scalar>
</property>
<property dictRef="me:epsilon">
  <scalar>600.0</scalar>
</property>
<property dictRef="me:sigma">
  <scalar>6.2</scalar>
</property>
</propertyList>
<me:energyTransferModel xsi:type="me:ExponentialDown">
  <me:deltaEDown units="cm-1">250.0</me:deltaEDown>
</me:energyTransferModel>
<me:DOSCMETHOD>ClassicalRotors</me:DOSCMETHOD>
</molecule>
<molecule id="TS_H">
  <propertyList>
    <property dictRef="me:ZPE">
      <scalar units="kJ/mol">44.6</scalar>
    </property>
    <property dictRef="me:rotConsts">
      <array units="cm-1">
        0.096374
        0.062069
        0.042051
      </array>
    </property>
    <property dictRef="me:symmetryNumber">
      <scalar>1</scalar>
    </property>
```

mesmer-input.txt

```
<property dictRef="me:frequenciesScaleFactor">
  <scalar>0.974</scalar>
</property>
<property dictRef="me:vibFreqs">
  <array units="cm-1">
    98.6190
    141.6793
    213.4953
    230.9282
    291.3915
    319.4900
    352.7072
    374.1998
    447.1635
    539.7790
    594.6731
    670.3241
    701.8744
    841.8923
    877.6741
    905.2308
    954.8168
    957.5023
    1074.8320
    1112.0089
    1119.9504
    1132.9059
    1172.7942
    1175.4804
    1202.8281
    1290.4217
    1366.3255
    1383.6409
    1395.4798
    1405.7080
    1428.0240
    1487.1079
    1489.5283
    1495.1638
    1496.0774
    1679.8871
    2969.1820
    3067.9857
    3082.0739
    3117.8136
    3150.7411
    3162.4138
    3169.3479
    3180.5086
  </array>
</property>
<property dictRef="me:MW">
  <scalar units="amu">121.05008</scalar>
</property>
<property dictRef="me:spinMultiplicity">
  <scalar>2</scalar>
```

mesmer-input.txt

```
</property>
<property dictRef="me:imFreqs">
  <scalar units="cm-1">2201.4433</scalar>
</property>
</propertyList>
<me:DOSCMeth>ClassicalRotors</me:DOSCMeth>
</molecule>
<molecule id="TS_D">
  <propertyList>
    <property dictRef="me:ZPE">
      <scalar units="kJ/mol">45.2</scalar>
    </property>
    <property dictRef="me:rotConsts">
      <array units="cm-1">
        0.095789
        0.056556
        0.050173
      </array>
    </property>
    <property dictRef="me:symmetryNumber">
      <scalar>1</scalar>
    </property>
    <property dictRef="me:frequenciesScaleFactor">
      <scalar>0.974</scalar>
    </property>
    <property dictRef="me:vibFreqs">
      <array units="cm-1">
        84.2451
        112.6676
        199.5594
        209.8030
        236.6937
        258.9526
        268.9934
        346.3859
        379.4615
        434.9340
        500.4151
        617.6594
        647.2881
        679.0320
        725.3785
        802.4669
        834.9314
        906.1239
        979.5671
        1019.7879
        1082.9857
        1115.6154
        1157.6697
        1174.8507
        1208.6457
        1369.8354
        1379.4129
        1407.5507
        1423.3364
      </array>
    </property>
  </propertyList>
</molecule>
```



mesmer-input.txt

```
1432.7445
1448.0008
1489.5734
1498.7654
1511.0392
1569.3983
3056.7067
3077.9940
3100.3124
3127.4219
3156.8733
3174.6967
3257.4759
3274.3736
3596.3200
</array>
</property>
<property dictRef="me:MW">
  <scalar units="amu">121.05008</scalar>
</property>
<property dictRef="me:spinMultiplicity">
  <scalar>2</scalar>
</property>
<property dictRef="me:imFreqs">
  <scalar units="cm-1">506.8648</scalar>
</property>
</propertyList>
<me:DOSCMETHOD>ClassicalRotors</me:DOSCMETHOD>
</molecule>
<molecule id="N2">
  <atom elementType="N2" />
  <propertyList>
    <property dictRef="me:epsilon">
      <scalar>48.0</scalar>
    </property>
    <property dictRef="me:sigma">
      <scalar>3.9</scalar>
    </property>
    <property dictRef="me:MW">
      <scalar units="amu">28.0</scalar>
    </property>
  </propertyList>
</molecule>
</moleculeList>
<reactionList>
  <reaction id="Decomp">
    <reactant>
      <molecule ref="OQ200H" role="modelled" />
    </reactant>
    <product>
      <molecule ref="PID" role="sink" />
    </product>
    <me:transitionState>
      <molecule ref="TS_D" role="transitionState" />
    </me:transitionState>
    <me:tunneling name="Eckart"/>
  </reaction>
</reactionList>
```

mesmer-input.txt

```
<me:MCRCMethod name="SimpleRRKM"/>
</reaction>
<reaction id="H_Shift">
  <reactant>
    <molecule ref="OQ200H" role="modelled" />
  </reactant>
  <product>
    <molecule ref="PIH" role="sink" />
  </product>
  <me:transitionState>
    <molecule ref="TS_H" role="transitionState" />
  </me:transitionState>
  <me:tunneling name="Eckart"/>
  <me:MCRCMethod name="SimpleRRKM"/>
</reaction>
</reactionList>
<me:conditions>
  <me:bathGas>N2</me:bathGas>
  <me:PTs>
    <me:PTpair units="Torr" P="760.0" T="233.0" />
    <me:PTpair units="Torr" P="760.0" T="243.0" />
    <me:PTpair units="Torr" P="760.0" T="253.0" />
    <me:PTpair units="Torr" P="760.0" T="263.0" />
    <me:PTpair units="Torr" P="760.0" T="273.0" />
    <me:PTpair units="Torr" P="760.0" T="283.0" />
    <me:PTpair units="Torr" P="760.0" T="293.0" />
    <me:PTpair units="Torr" P="760.0" T="298.15" />
    <me:PTpair units="Torr" P="760.0" T="303.0" />
    <me:PTpair units="Torr" P="760.0" T="313.0" />
    <me:PTpair units="Torr" P="760.0" T="323.0" />
    <me:PTpair units="Torr" P="760.0" T="333.0" />
    <me:PTpair units="Torr" P="760.0" T="343.0" />
  </me:PTs>
  <me:InitialPopulation>
    <me:molecule ref="OQ200H" population="1.0" />
  </me:InitialPopulation>
</me:conditions>
<me:modelParameters>
  <!--Specify grain size directly...-->
  <me:grainSize units="cm-1">50</me:grainSize>
  <!--...or by the total number of grains
    <me:numberOfGrains> 500 </me:numberOfGrains>-->
  <!--Specify increased energy range
    <me:maxTemperature>6000</me:maxTemperature>-->
  <me:energyAboveTheTopHill>30.0</me:energyAboveTheTopHill>
  <me:automaticallySetMaxEne>1.0e-09</me:automaticallySetMaxEne>
</me:modelParameters>
<me:control>
  <me:printSpeciesProfile />
  <me:testRateConstants />
  <me:eigenvalues>10</me:eigenvalues>
</me:control>
</me:mesmer>
```

\*\*\*\*\* (CH3)2CHOC(OO) (CH3)2

mesmer-input.txt

```
<?xml version="1.0" encoding="utf-8" ?>
<?xml-stylesheet type='text/xsl' href='../..mesmer2.xsl' media='other'?>
<?xml-stylesheet type='text/xsl' href='../..mesmer1.xsl' media='screen'?>
<me:mesmer xmlns="http://www.xml-cml.org/schema"
xmlns:me="http://www.chem.leeds.ac.uk/mesmer"
xmlns:xsi="http://www.w3.org/2001/XMLSchema-instance">
  <me:title>DiPEyl + O2 With Internal Rotation</me:title>
  <moleculeList>
    <molecule id="O2" description="oxygen">
      <propertyList>
        <property dictRef="me:ZPE">
          <scalar units="kJ/mol">0.0</scalar>
        </property>
        <property dictRef="me:rotConsts">
          <array units="cm-1">1.597738</array>
        </property>
        <property dictRef="me:symmetryNumber">
          <scalar>2</scalar>
        </property>
        <property dictRef="me:frequenciesScaleFactor">
          <scalar>0.974</scalar>
        </property>
        <property dictRef="me:vibFreqs">
          <array units="cm-1">1770.2010</array>
        </property>
        <property dictRef="me:MW">
          <scalar units="amu">32</scalar>
        </property>
        <property dictRef="me:spinMultiplicity">
          <scalar>3</scalar>
        </property>
      </propertyList>
      <me:DOSCMETHOD>ClassicalRotors</me:DOSCMETHOD>
    </molecule>
    <molecule id="R3" description="radical">
      <propertyList>
        <property dictRef="me:ZPE">
          <scalar units="kJ/mol">0.0</scalar>
        </property>
        <property dictRef="me:rotConsts">
          <array units="cm-1">
            0.1415550
            0.0537129
            0.0483179
          </array>
        </property>
        <property dictRef="me:symmetryNumber">
          <scalar>1</scalar>
        </property>
        <property dictRef="me:frequenciesScaleFactor">
          <scalar>0.974</scalar>
        </property>
        <property dictRef="me:vibFreqs">
          <array units="cm-1">
            86.4901
            98.6789
          </array>
        </property>
      </propertyList>
    </molecule>
  </moleculeList>
</me:mesmer>
```

mesmer-input.txt

171.9247  
180.8910  
184.2386  
223.2317  
252.1651  
322.1405  
357.6906  
406.7456  
411.9082  
491.5945  
515.9672  
797.1164  
864.8314  
941.9355  
949.2683  
954.9034  
958.3312  
979.5305  
1064.0958  
1097.0993  
1170.0681  
1181.4774  
1208.1809  
1306.2589  
1326.2200  
1375.8112  
1385.8788  
1403.3686  
1411.2191  
1420.3077  
1423.5346  
1471.0544  
1480.3459  
1481.4257  
1489.2193  
1493.3970  
1496.3505  
1503.9278  
1513.4972  
2990.0231  
2997.9465  
3040.7102  
3045.0835  
3056.0994  
3083.5170  
3088.6181  
3118.4564  
3128.5712  
3129.5350  
3130.2303  
3135.4372  
3149.5576

```
</array>  
</property>  
<property dictRef="me:MW">  
  <scalar units="amu">101.09664</scalar>
```

```

</property>
<property dictRef="me:spinMultiplicity">
  <scalar>2</scalar>
</property>
<property dictRef="me:epsilon">
  <scalar>420.0</scalar>
</property>
<property dictRef="me:sigma">
  <scalar>6.52</scalar>
</property>
</propertyList>
<me:energyTransferModel xsi:type="me:ExponentialDown">
  <me:deltaEDown units="cm-1">250.0</me:deltaEDown>
</me:energyTransferModel>
<me:DOSCMMethod name="ClassicalRotors"/>
</molecule>
<molecule id="R300" description="R00">
<atomArray>
<atom id="a1" elementType="O" x3="0.281116" y3="-0.103874" z3="0.671797"/>
<atom id="a2" elementType="C" x3="1.424668" y3="0.063052" z3="-0.177781"/>
<atom id="a3" elementType="H" x3="1.092297" y3="0.137972" z3="-1.215782"/>
<atom id="a4" elementType="C" x3="2.350971" y3="-1.128455" z3="-0.010872"/>
<atom id="a5" elementType="H" x3="1.860906" y3="-2.056709" z3="-0.301772"/>
<atom id="a6" elementType="H" x3="3.245367" y3="-1.004021" z3="-0.621506"/>
<atom id="a7" elementType="H" x3="2.653756" y3="-1.212182" z3="1.033240"/>
<atom id="a8" elementType="C" x3="2.082460" y3="1.369772" z3="0.222076"/>
<atom id="a9" elementType="H" x3="2.969118" y3="1.553897" z3="-0.384305"/>
<atom id="a10" elementType="H" x3="1.384022" y3="2.194867" z3="0.094037"/>
<atom id="a11" elementType="H" x3="2.379758" y3="1.326518" z3="1.270295"/>
<atom id="a12" elementType="C" x3="-0.941448" y3="-1.663322" z3="-0.754608"/>
<atom id="a13" elementType="H" x3="-0.701774" y3="-2.513999" z3="-0.119352"/>
<atom id="a14" elementType="H" x3="-1.928486" y3="-1.809640" z3="-1.188933"/>
<atom id="a15" elementType="H" x3="-0.214682" y3="-1.606279" z3="-1.562715"/>
<atom id="a16" elementType="C" x3="-1.973098" y3="-0.394441" z3="1.180218"/>
<atom id="a17" elementType="H" x3="-1.751128" y3="-1.187937" z3="1.890776"/>
<atom id="a18" elementType="H" x3="-1.942824" y3="0.564027" z3="1.692502"/>
<atom id="a19" elementType="H" x3="-2.963067" y3="-0.553835" z3="0.757162"/>
<atom id="a20" elementType="C" x3="-0.929095" y3="-0.401872" z3="0.088328"/>
<atom id="a21" elementType="O" x3="-1.275373" y3="0.653792" z3="-0.895985"/>
<atom id="a22" elementType="O" spinMultiplicity="2" x3="-1.257244"
y3="1.839110" z3="-0.379715"/>
</atomArray>
<bondArray>
<bond atomRefs2="a15 a12" order="1"/>
<bond atomRefs2="a3 a2" order="1"/>
<bond atomRefs2="a14 a12" order="1"/>
<bond atomRefs2="a21 a22" order="1"/>
<bond id="b1" atomRefs2="a21 a20" order="1"/>
<bond atomRefs2="a12 a13" order="1"/>
<bond atomRefs2="a12 a20" order="1"/>
<bond atomRefs2="a6 a4" order="1"/>
<bond atomRefs2="a9 a8" order="1"/>
<bond atomRefs2="a5 a4" order="1"/>
<bond atomRefs2="a2 a4" order="1"/>
<bond atomRefs2="a2 a8" order="1"/>
<bond atomRefs2="a2 a1" order="1"/>

```

mesmer-input.txt

```
<bond atomRefs2="a4 a7" order="1"/>
<bond atomRefs2="a20 a1" order="1"/>
<bond atomRefs2="a20 a16" order="1"/>
<bond atomRefs2="a10 a8" order="1"/>
<bond atomRefs2="a8 a11" order="1"/>
<bond atomRefs2="a19 a16" order="1"/>
<bond atomRefs2="a16 a18" order="1"/>
<bond atomRefs2="a16 a17" order="1"/>
</bondArray>
<propertyList>
  <property dictRef="me:ZPE">
    <scalar units="kJ/mol"> -159.6</scalar>
  </property>
  <property dictRef="me:rotConsts">
    <array units="cm-1">
      0.0738452
      0.0438450
      0.0345556
    </array>
  </property>
  <property dictRef="me:symmetryNumber">
    <scalar>1</scalar>
  </property>
  <property dictRef="me:frequenciesScaleFactor">
    <scalar>0.974</scalar>
  </property>
  <property dictRef="me:vibFreqs">
    <array units="cm-1">
      71.8197
      90.6073
      188.8728
      196.9884
      239.5326
      250.5359
      283.9924
      298.6257
      310.6634
      329.4303
      362.9969
      419.6144
      468.9534
      479.0846
      552.2562
      617.5498
      762.8031
      829.8768
      884.6818
      931.8872
      940.7642
      948.3883
      956.4169
      1018.4141
      1079.2376
      1152.9246
      1172.1848
      1183.9621
```

```
1211.4731
1289.6955
1292.4602
1320.0534
1367.9276
1400.8882
1405.5711
1410.3789
1421.2022
1426.0865
1480.3554
1486.2736
1486.5723
1490.0793
1495.8023
1503.3835
1511.6834
1514.9257
3045.8355
3049.8577
3068.0655
3072.7016
3075.377
3119.6276
3127.8539
3130.8007
3138.6629
3151.8803
3155.5595
3162.3001
3166.2899
</array>
</property>
<property dictRef="me:MW">
  <scalar units="amu">133.08647</scalar>
</property>
<property dictRef="me:spinMultiplicity">
  <scalar>2</scalar>
</property>
<property dictRef="me:eletronicExcitation">
  <array units="cm-1">0</array>
</property>
<property dictRef="me:epsilon">
  <scalar>560.0</scalar>
</property>
<property dictRef="me:sigma">
  <scalar>6.82</scalar>
</property>
</propertyList>
<me:energyTransferModel xsi:type="me:ExponentialDown">
  <me:deltaEDown units="cm-1">250.0</me:deltaEDown>
</me:energyTransferModel>
<me:DOSCMETHOD name="ClassicalRotors"/>
<me:ExtraDOSCMETHOD xsi:type="me:HinderedRotorQM1D">
  <me:bondRef>b1</me:bondRef>
  <me:HinderedRotorPotential format="numerical" units="kJ/mol">
```

```

expansionSize="7" scale="1" UseSineTerms="yes">
  <me:PotentialPoint angle="0.0" potential="9.3951" />
  <me:PotentialPoint angle="10.0" potential="10.0743" />
  <me:PotentialPoint angle="20.0" potential="10.0040" />
  <me:PotentialPoint angle="30.0" potential="8.9128" />
  <me:PotentialPoint angle="40.0" potential="7.2709" />
  <me:PotentialPoint angle="50.0" potential="5.4228" />
  <me:PotentialPoint angle="60.0" potential="4.2590" />
  <me:PotentialPoint angle="70.0" potential="3.7551" />
  <me:PotentialPoint angle="80.0" potential="3.5594" />
  <me:PotentialPoint angle="90.0" potential="3.5234" />
  <me:PotentialPoint angle="100.0" potential="3.7106" />
  <me:PotentialPoint angle="110.0" potential="4.5494" />
  <me:PotentialPoint angle="120.0" potential="5.2996" />
  <me:PotentialPoint angle="130.0" potential="5.5489" />
  <me:PotentialPoint angle="140.0" potential="5.0109" />
  <me:PotentialPoint angle="150.0" potential="3.7974" />
  <me:PotentialPoint angle="160.0" potential="2.1651" />
  <me:PotentialPoint angle="170.0" potential="0.7846" />
  <me:PotentialPoint angle="180.0" potential="0.2313" />
  <me:PotentialPoint angle="190.0" potential="1.2048" />
  <me:PotentialPoint angle="200.0" potential="3.6284" />
  <me:PotentialPoint angle="210.0" potential="6.5692" />
  <me:PotentialPoint angle="220.0" potential="9.1925" />
  <me:PotentialPoint angle="230.0" potential="10.9429" />
  <me:PotentialPoint angle="240.0" potential="11.5374" />
  <me:PotentialPoint angle="250.0" potential="10.8383" />
  <me:PotentialPoint angle="260.0" potential="9.1710" />
  <me:PotentialPoint angle="270.0" potential="6.7492" />
  <me:PotentialPoint angle="280.0" potential="4.1946" />
  <me:PotentialPoint angle="290.0" potential="1.6856" />
  <me:PotentialPoint angle="300.0" potential="0.1410" />
  <me:PotentialPoint angle="310.0" potential="0.00" />
  <me:PotentialPoint angle="320.0" potential="1.3190" />
  <me:PotentialPoint angle="330.0" potential="3.4552" />
  <me:PotentialPoint angle="340.0" potential="5.8512" />
  <me:PotentialPoint angle="350.0" potential="7.8581" />
  <me:PotentialPoint angle="360.0" potential="9.3951" />
</me:HinderedRotorPotential>
<me:periodicity>1</me:periodicity>
</me:ExtraDOSMethod>
</molecule>
<molecule id="Q300H">
  <propertyList>
    <property dictRef="me:ZPE">
      <scalar units="kJ/mol">-120.6</scalar>
    </property>
    <property dictRef="me:rotConsts">
      <array units="cm-1">
        0.0729873
        0.0411594
        0.0387814
      </array>
    </property>
    <property dictRef="me:symmetryNumber">
      <scalar>1</scalar>
  </propertyList>

```



mesmer-input.txt

```
</property>
<property dictRef="me:frequenciesScaleFactor">
  <scalar>0.974</scalar>
</property>
<property dictRef="me:vibFreqs">
  <array units="cm-1">
    74.5917
    99.6528
    162.816
    183.4619
    193.4954
    208.234
    234.5153
    270.076
    280.0639
    333.8413
    347.7769
    375.2482
    378.224
    403.9147
    429.0883
    460.6499
    578.154
    624.2887
    783.8024
    846.1125
    913.3156
    945.404
    946.3728
    969.5266
    983.4419
    1024.0631
    1057.7673
    1070.3767
    1104.2996
    1206.622
    1257.3368
    1273.3994
    1305.676
    1330.3895
    1402.9649
    1412.299
    1416.0844
    1422.1637
    1458.9989
    1472.2098
    1479.5605
    1482.9036
    1490.6733
    1493.2603
    1499.2304
    1509.8329
    1517.0291
    2994.6136
    2999.0171
    3076.7982
```

mesmer-input.txt

```
3082.3902
3095.878
3100.8339
3136.7494
3148.5424
3153.9295
3160.4946
3171.9447
3180.1157
3706.2686
</array>
</property>
<property dictRef="me:MW">
  <scalar units="amu">133.08647</scalar>
</property>
<property dictRef="me:spinMultiplicity">
  <scalar>2</scalar>
</property>
<property dictRef="me:epsilon">
  <scalar>560.0</scalar>
</property>
<property dictRef="me:sigma">
  <scalar>6.82</scalar>
</property>
</propertyList>
<me:energyTransferModel xsi:type="me:ExponentialDown">
  <me:deltaEDown units="cm-1">250.0</me:deltaEDown>
</me:energyTransferModel>
<me:DOSCMETHOD>ClassicalRotors</me:DOSCMETHOD>
</molecule>
<molecule id="TS_H_shift">
  <propertyList>
    <property dictRef="me:ZPE">
      <scalar units="kJ/mol">-86.4</scalar>
    </property>
    <property dictRef="me:rotConsts">
      <array units="cm-1">
        0.0761951
        0.0412811
        0.0410202
      </array>
    </property>
    <property dictRef="me:symmetryNumber">
      <scalar>1</scalar>
    </property>
    <property dictRef="me:frequenciesScaleFactor">
      <scalar>0.974</scalar>
    </property>
    <property dictRef="me:vibFreqs">
      <array units="cm-1">
        78.8429
        103.1025
        159.5862
        182.4606
        215.5994
        252.6128
```

mesmer-input.txt

259.7257  
283.3073  
323.4348  
333.621  
377.8351  
406.4435  
456.4242  
515.2567  
541.99  
562.5926  
639.7869  
804.7665  
854.1153  
897.8409  
937.1375  
944.1242  
961.3675  
973.054  
1022.6241  
1057.3004  
1089.3655  
1134.8054  
1160.8336  
1206.2593  
1256.3482  
1265.9738  
1273.2143  
1303.7347  
1397.2419  
1409.2462  
1412.1341  
1424.4582  
1471.6214  
1476.4269  
1481.7016  
1487.7894  
1494.4412  
1495.1226  
1500.0039  
1518.7257  
1659.2084  
3032.5429  
3038.5228  
3073.8402  
3082.0134  
3108.4808  
3115.1705  
3139.5173  
3148.5753  
3154.2683  
3164.6502  
3172.5734  
3173.0258

</array>  
</property>  
<property dictRef="me:MW">

```

mesmer-input.txt
  <scalar units="amu">133.08647</scalar>
</property>
<property dictRef="me:spinMultiplicity">
  <scalar>2</scalar>
</property>
<property dictRef="me:imFreqs">
  <scalar units="cm-1">1806.3930</scalar>
</property>
</propertyList>
<me:DOSMethod>ClassicalRotors</me:DOSMethod>
</molecule>
<molecule id="00Q300H">
  <propertyList>
    <property dictRef="me:ZPE">
      <scalar units="kJ/mol">-250</scalar>
    </property>
    <property dictRef="me:rotConsts">
      <array units="cm-1">
0.157444374
0.070631983
0.054923849
      </array>
    </property>
    <property dictRef="me:symmetryNumber">
      <scalar>1</scalar>
    </property>
    <property dictRef="me:frequenciesScaleFactor">
      <scalar>0.974</scalar>
    </property>
    <property dictRef="me:vibFreqs">
      <array units="cm-1">
81.9261
105.0616
155.0602
226.9255
314.251
372.3583
424.2656
456.0055
528.59
682.9059
963.6882
981.4374
1018.727
1106.512
1134.017
1184.574
1234.109
1289.467
1314.044
1330.885
1411.263
1439.189
1462.25
1490.188
1517.613
      </array>
    </property>
  </propertyList>
</molecule>

```

3090.145

3096.316

3170.854

3180.728

3779.973

```

    </array>
  </property>
  <property dictRef="me:MW">
    <scalar units="amu">109</scalar>
  </property>
  <property dictRef="me:spinMultiplicity">
    <scalar>2</scalar>
  </property>
</propertyList>
<me:DOSCMethod>ClassicalRotors</me:DOSCMethod>
</molecule>
<molecule id="N2">
  <atom elementType="N2" />
  <propertyList>
    <property dictRef="me:epsilon">
      <scalar>48.0</scalar>
    </property>
    <property dictRef="me:sigma">
      <scalar>3.9</scalar>
    </property>
    <property dictRef="me:MW">
      <scalar units="amu">28.0</scalar>
    </property>
  </propertyList>
</molecule>
</moleculeList>
<reactionList>
  <reaction id="R3_00">
    <reactant>
      <molecule ref="R3" role="deficientReactant" />
    </reactant>
    <reactant>
      <molecule ref="O2" role="excessReactant" />
    </reactant>
    <product>
      <molecule ref="R300" role="modelled" />
    </product>
    <me:MCRCMethod xsi:type="me:MesmerILT">
      <me:preExponential units="cm3molecule-1s-1">6.00e-12</me:preExponential>
      <me:activationEnergy units="kJ/mol">0.0</me:activationEnergy>
      <me:TInfinity>298.0</me:TInfinity>
      <me:nInfinity>0.00000000001</me:nInfinity>
    </me:MCRCMethod>
    <me:excessReactantConc>4.67E18</me:excessReactantConc>
  </reaction>
  <reaction id="H_shift" reversible="true">
    <reactant>
      <molecule ref="R300" role="modelled" />
    </reactant>
    <product>
      <molecule ref="Q300H" role="modelled" />

```

mesmer-input.txt

```
</product>
<me:transitionState>
  <molecule ref="TS_H_shift" role="transitionState" />
</me:transitionState>
<me:tunneling name="Eckart" />
<me:MCRCMethod name="SimpleRRKM" />
</reaction>
<reaction id="Q300H_02">
  <reactant>
    <molecule ref="Q300H" role="modelled" />
  </reactant>
  <reactant>
    <molecule ref="O2" role="excessReactant" />
  </reactant>
  <product>
    <molecule ref="OOQ300H" role="sink" />
  </product>
  <me:MCRCMethod name="SimpleBimolecularSink" />
</reaction>
<me:BimolecularLossRateCoefficient>6.00e-12</me:BimolecularLossRateCoefficient>
  <me:excessReactantConc>4.67E18</me:excessReactantConc>
</reaction>
</reactionList>
<me:conditions>
  <me:bathGas>N2</me:bathGas>
  <me:PTs>
    <me:PTpair units="Torr" P="760.0" T="233.0" />
    <me:PTpair units="Torr" P="760.0" T="243.0" />
    <me:PTpair units="Torr" P="760.0" T="253.0" />
    <me:PTpair units="Torr" P="760.0" T="263.0" />
    <me:PTpair units="Torr" P="760.0" T="273.0" />
    <me:PTpair units="Torr" P="760.0" T="283.0" />
    <me:PTpair units="Torr" P="760.0" T="293.0" />
    <me:PTpair units="Torr" P="760.0" T="298.0" />
    <me:PTpair units="Torr" P="760.0" T="303.0" />
    <me:PTpair units="Torr" P="760.0" T="313.0" />
    <me:PTpair units="Torr" P="760.0" T="323.0" />
    <me:PTpair units="Torr" P="760.0" T="333.0" />
  </me:PTs>
  <me:InitialPopulation>
    <me:molecule ref="R3" population="1.0" />
  </me:InitialPopulation>
</me:conditions>
<me:modelParameters>
  <!--Specify grain size directly...-->
  <me:grainSize units="cm-1">50</me:grainSize>
  <!--...or by the total number of grains
    <me:numberOfGrains> 500 </me:numberOfGrains>-->
  <!--Specify increased energy range
    <me:maxTemperature>6000</me:maxTemperature>-->
  <me:energyAboveTheTopHill>25.0</me:energyAboveTheTopHill>
  <me:automaticallySetMaxEne>1.0e-09</me:automaticallySetMaxEne>
</me:modelParameters>
<me:control>
  <me:printSpeciesProfile />
  <me:testRateConstants />
```

mesmer-input.txt

```
<me:eigenvalues>10</me:eigenvalues>
</me:control>
</me:mesmer>
```

\*\*\*\*\* (CH3)2C(O)OC(OOH)(CH3)2

```
<?xml version="1.0" encoding="utf-8" ?>
<?xml-stylesheet type='text/xsl' href='../..../mesmer2.xsl' media='other'?>
<?xml-stylesheet type='text/xsl' href='../..../mesmer1.xsl' media='screen'?>
<me:mesmer xmlns="http://www.xml-cml.org/schema"
xmlns:me="http://www.chem.leeds.ac.uk/mesmer"
xmlns:xsi="http://www.w3.org/2001/XMLSchema-instance">
  <me:title>(CH3)2C(OOH)OC(O)(CH3)2 H-Shift and CH3-Elimination</me:title>
  <moleculeList>
    <molecule id="OQ300H">
      <propertyList>
        <property dictRef="me:ZPE">
          <scalar units="kJ/mol">0.0</scalar>
        </property>
        <property dictRef="me:rotConsts">
          <array units="cm-1">
            0.063447
            0.036546
            0.032441
          </array>
        </property>
        <property dictRef="me:symmetryNumber">
          <scalar>1</scalar>
        </property>
        <property dictRef="me:frequenciesScaleFactor">
          <scalar>0.974</scalar>
        </property>
        <property dictRef="me:vibFreqs">
          <array units="cm-1">
            71.0928
            135.8256
            176.2905
            206.025
            219.1042
            224.8614
            240.6054
            285.9782
            302.3917
            314.6968
            332.5812
            363.1922
            377.8464
            389.3541
            416.3332
            477.067
            525.7727
            548.148
            591.6906
            653.1212
            780.7237
          </array>
        </property>
      </propertyList>
    </molecule>
  </moleculeList>
</me:mesmer>
```

mesmer-input.txt

831.7658  
905.7679  
914.392  
936.5639  
950.9015  
955.2263  
963.1731  
1020.2948  
1053.7233  
1067.2567  
1139.1175  
1159.9747  
1185.6082  
1250.4626  
1255.2175  
1295.5583  
1373.7433  
1400.3066  
1410.0955  
1427.1843  
1471.6906  
1480.2166  
1482.7619  
1483.8332  
1488.2192  
1494.3078  
1500.3363  
1511.6734  
1524.4625  
3066.29  
3074.2026  
3075.3463  
3077.9137  
3147.9851  
3153.7409  
3155.8123  
3164.5887  
3167.6643  
3170.8581  
3175.694  
3181.7535  
3697.1628

```
</array>  
</property>  
<property dictRef="me:MW">  
  <scalar units="amu">149.08138</scalar>  
</property>  
<property dictRef="me:spinMultiplicity">  
  <scalar>2</scalar>  
</property>  
<property dictRef="me:epsilon">  
  <scalar>600.0</scalar>  
</property>  
<property dictRef="me:sigma">  
  <scalar>6.8</scalar>  
</property>
```



mesmer-input.txt

```
</propertyList>
<me:energyTransferModel xsi:type="me:ExponentialDown">
  <me:deltaEDown units="cm-1">250.0</me:deltaEDown>
</me:energyTransferModel>
<me:DOSCMethod>ClassicalRotors</me:DOSCMethod>
</molecule>
<molecule id="TS_D">
  <propertyList>
    <property dictRef="me:ZPE">
      <scalar units="kJ/mol">25.4</scalar>
    </property>
    <property dictRef="me:rotConsts">
      <array units="cm-1">
        0.061382
        0.036079
        0.032292
      </array>
    </property>
    <property dictRef="me:symmetryNumber">
      <scalar>1</scalar>
    </property>
    <property dictRef="me:frequenciesScaleFactor">
      <scalar>0.974</scalar>
    </property>
    <property dictRef="me:vibFreqs">
      <array units="cm-1">
        75.7452
        102.0470
        183.5164
        192.8250
        207.7498
        225.9635
        244.9940
        256.0510
        275.4453
        288.9887
        322.5749
        333.2254
        354.8107
        384.3943
        448.7002
        497.2777
        561.5120
        568.1677
        640.3546
        671.4234
        717.0549
        770.8737
        800.3821
        855.5345
        912.0550
        957.5892
        987.2852
        1024.4013
        1032.8610
        1051.3763
      </array>
    </property>
  </propertyList>
</molecule>
```

mesmer-input.txt

```
1082.6801
1134.6818
1170.4134
1250.1590
1261.7971
1301.8139
1403.7068
1412.7549
1423.3953
1428.0906
1451.6050
1479.1186
1482.4770
1485.8371
1486.6848
1496.9356
1503.2841
1512.8343
1552.0585
3067.3136
3077.1435
3078.3804
3106.3169
3149.5760
3152.6695
3156.7943
3160.0650
3181.6386
3188.4256
3258.4440
3284.6886
3565.1930
</array>
</property>
<property dictRef="me:MW">
  <scalar units="amu">149.08138</scalar>
</property>
<property dictRef="me:spinMultiplicity">
  <scalar>2</scalar>
</property>
<property dictRef="me:imFreqs">
  <scalar units="cm-1">527.837</scalar>
</property>
</propertyList>
<me:DOSMethod>ClassicalRotors</me:DOSMethod>
</molecule>
<molecule id="TS_H">
  <propertyList>
    <property dictRef="me:ZPE">
      <scalar units="kJ/mol">34.3</scalar>
    </property>
    <property dictRef="me:rotConsts">
      <array units="cm-1">
        0.064309
        0.037845
        0.033856
```

mesmer-input.txt

```
</array>
</property>
<property dictRef="me:symmetryNumber">
  <scalar>1</scalar>
</property>
<property dictRef="me:frequenciesScaleFactor">
  <scalar>0.974</scalar>
</property>
<property dictRef="me:vibFreqs">
  <array units="cm-1">
    98.5954
    154.9993
    174.7486
    208.6280
    216.9321
    253.5256
    278.2446
    302.3067
    328.9242
    352.7037
    369.7639
    378.8114
    383.1079
    445.9523
    479.7825
    526.0657
    573.3028
    643.0115
    654.1526
    783.7819
    830.2792
    841.7876
    905.1108
    926.8131
    938.3111
    946.3024
    980.5661
    1008.9715
    1020.7123
    1068.5814
    1139.3183
    1163.1743
    1193.7202
    1207.7503
    1243.7519
    1263.6825
    1292.6612
    1380.8836
    1404.8118
    1408.6675
    1418.2958
    1473.5785
    1480.0594
    1484.6419
    1488.3278
    1496.4764
```

mesmer-input.txt

```
1500.3548
1514.1960
1521.3586
1638.6132
3070.0621
3070.5125
3074.2551
3077.8546
3149.2114
3149.4126
3157.3804
3157.5918
3166.7153
3167.3963
3179.0303
3184.3342
</array>
</property>
<property dictRef="me:MW">
  <scalar units="amu">2642.47</scalar>
</property>
<property dictRef="me:spinMultiplicity">
  <scalar>2</scalar>
</property>
<property dictRef="me:imFreqs">
  <scalar units="cm-1">586.4634</scalar>
</property>
</propertyList>
<me:DOSMethod>ClassicalRotors</me:DOSMethod>
</molecule>
<molecule id="PIH">
  <propertyList>
    <property dictRef="me:ZPE">
      <scalar units="kJ/mol">-40.0</scalar>
    </property>
    <property dictRef="me:rotConsts">
      <array units="cm-1">
        0.063447
        0.036546
        0.032441
      </array>
    </property>
    <property dictRef="me:symmetryNumber">
      <scalar>1</scalar>
    </property>
    <property dictRef="me:frequenciesScaleFactor">
      <scalar>0.974</scalar>
    </property>
    <property dictRef="me:vibFreqs">
      <array units="cm-1">
        71.0928
        135.8256
        176.2905
        206.025
        219.1042
        224.8614
```

mesmer-input.txt

240.6054  
285.9782  
302.3917  
314.6968  
332.5812  
363.1922  
377.8464  
389.3541  
416.3332  
477.067  
525.7727  
548.148  
591.6906  
653.1212  
780.7237  
831.7658  
905.7679  
914.392  
936.5639  
950.9015  
955.2263  
963.1731  
1020.2948  
1053.7233  
1067.2567  
1139.1175  
1159.9747  
1185.6082  
1250.4626  
1255.2175  
1295.5583  
1373.7433  
1400.3066  
1410.0955  
1427.1843  
1471.6906  
1480.2166  
1482.7619  
1483.8332  
1488.2192  
1494.3078  
1500.3363  
1511.6734  
1524.4625  
3066.29  
3074.2026  
3075.3463  
3077.9137  
3147.9851  
3153.7409  
3155.8123  
3164.5887  
3167.6643  
3170.8581  
3175.694  
3181.7535

```

3697.1628
</array>
</property>
<property dictRef="me:MW">
  <scalar units="amu">149.08138</scalar>
</property>
<property dictRef="me:spinMultiplicity">
  <scalar>2</scalar>
</property>
<property dictRef="me:epsilon">
  <scalar>600.0</scalar>
</property>
<property dictRef="me:sigma">
  <scalar>6.8</scalar>
</property>
</propertyList>
<me:energyTransferModel xsi:type="me:ExponentialDown">
  <me:deltaEDown units="cm-1">250.0</me:deltaEDown>
</me:energyTransferModel>
<me:DOSCMethod>ClassicalRotors</me:DOSCMethod>
</molecule>
<molecule id="P1D">
  <propertyList>
    <property dictRef="me:ZPE">
      <scalar units="kJ/mol">-10.0</scalar>
    </property>
    <property dictRef="me:rotConsts">
      <array units="cm-1">
        0.063447
        0.036546
        0.032441
      </array>
    </property>
    <property dictRef="me:symmetryNumber">
      <scalar>1</scalar>
    </property>
    <property dictRef="me:frequenciesScaleFactor">
      <scalar>0.974</scalar>
    </property>
    <property dictRef="me:vibFreqs">
      <array units="cm-1">
        71.0928
        135.8256
        176.2905
        206.025
        219.1042
        224.8614
        240.6054
        285.9782
        302.3917
        314.6968
        332.5812
        363.1922
        377.8464
        389.3541
        416.3332
      </array>
    </property>
  </propertyList>
</molecule>

```

477.067  
525.7727  
548.148  
591.6906  
653.1212  
780.7237  
831.7658  
905.7679  
914.392  
936.5639  
950.9015  
955.2263  
963.1731  
1020.2948  
1053.7233  
1067.2567  
1139.1175  
1159.9747  
1185.6082  
1250.4626  
1255.2175  
1295.5583  
1373.7433  
1400.3066  
1410.0955  
1427.1843  
1471.6906  
1480.2166  
1482.7619  
1483.8332  
1488.2192  
1494.3078  
1500.3363  
1511.6734  
1524.4625  
3066.29  
3074.2026  
3075.3463  
3077.9137  
3147.9851  
3153.7409  
3155.8123  
3164.5887  
3167.6643  
3170.8581  
3175.694  
3181.7535  
3697.1628

```
</array>  
</property>  
<property dictRef="me:MW">  
  <scalar units="amu">149.08138</scalar>  
</property>  
<property dictRef="me:spinMultiplicity">  
  <scalar>2</scalar>  
</property>
```

```

mesmer-input.txt
  <property dictRef="me:epsilon">
    <scalar>600.0</scalar>
  </property>
  <property dictRef="me:sigma">
    <scalar>6.8</scalar>
  </property>
</propertyList>
<me:energyTransferModel xsi:type="me:ExponentialDown">
  <me:deltaEDown units="cm-1">250.0</me:deltaEDown>
</me:energyTransferModel>
<me:DOSCMethod>ClassicalRotors</me:DOSCMethod>
</molecule>
<molecule id="N2">
  <atom elementType="N2" />
  <propertyList>
    <property dictRef="me:epsilon">
      <scalar>48.0</scalar>
    </property>
    <property dictRef="me:sigma">
      <scalar>3.9</scalar>
    </property>
    <property dictRef="me:MW">
      <scalar units="amu">28.0</scalar>
    </property>
  </propertyList>
</molecule>
</moleculeList>
<reactionList>
  <reaction id="Decomp">
    <reactant>
      <molecule ref="OQ300H" role="modelled" />
    </reactant>
    <product>
      <molecule ref="PID" role="sink" />
    </product>
    <me:transitionState>
      <molecule ref="TS_D" role="transitionState" />
    </me:transitionState>
    <me:tunneling name="Eckart"/>
    <me:MCRCMethod name="SimpleRRKM"/>
  </reaction>
  <reaction id="H_Shift">
    <reactant>
      <molecule ref="OQ300H" role="modelled" />
    </reactant>
    <product>
      <molecule ref="PIH" role="sink" />
    </product>
    <me:transitionState>
      <molecule ref="TS_H" role="transitionState" />
    </me:transitionState>
    <me:tunneling name="Eckart"/>
    <me:MCRCMethod name="SimpleRRKM"/>
  </reaction>
</reactionList>
<me:conditions>

```



mesmer-input.txt

```
<me:bathGas>N2</me:bathGas>
<me:PTs>
  <me:PTpair units="Torr" P="760.0" T="303.0" />
  <me:PTpair units="Torr" P="760.0" T="313.0" />
  <me:PTpair units="Torr" P="760.0" T="323.0" />
  <me:PTpair units="Torr" P="760.0" T="333.0" />
  <me:PTpair units="Torr" P="760.0" T="343.0" />
</me:PTs>
<me:InitialPopulation>
  <me:molecule ref="OQ300H" population="1.0" />
</me:InitialPopulation>
</me:conditions>
<me:modelParameters>
  <!--Specify grain size directly...-->
  <me:grainSize units="cm-1">50</me:grainSize>
  <!--...or by the total number of grains
  <me:numberOfGrains> 500 </me:numberOfGrains>-->
  <!--Specify increased energy range
  <me:maxTemperature>6000</me:maxTemperature>-->
  <me:energyAboveTheTopHill>30.0</me:energyAboveTheTopHill>
  <me:automaticallySetMaxEne>1.0e-09</me:automaticallySetMaxEne>
</me:modelParameters>
<me:control>
  <me:printSpeciesProfile />
  <me:testRateConstants />
  <me:eigenvalues>10</me:eigenvalues>
</me:control>
</me:mesmer>
```

\*\*\*\*\* CH3CH2OCH(O)CH3

```
<?xml version="1.0" encoding="utf-8" ?>
<?xml-stylesheet type='text/xsl' href='../.. /mesmer2.xsl' media='other' ?>
<?xml-stylesheet type='text/xsl' href='../.. /mesmer1.xsl' media='screen' ?>
<me:mesmer xmlns="http://www.xml-cml.org/schema"
xmlns:me="http://www.chem.leeds.ac.uk/mesmer"
xmlns:xsi="http://www.w3.org/2001/XMLSchema-instance">
  <me:title>CH3CH2OCH(O)CH3 Unimolecular Reactions</me:title>
  <moleculeList>
    <molecule id="CH3CH2OCHOCH3" spinMultiplicity="2">
      <propertyList>
        <property dictRef="me:ZPE">
          <scalar units="kJ/mol">0.0</scalar>
        </property>
        <property dictRef="me:rotConsts">
          <array units="cm-1">
            0.2667820
            0.0669082
            0.0572131
          </array>
        </property>
        <property dictRef="me:symmetryNumber">
          <scalar>1</scalar>
        </property>
        <property dictRef="me:frequenciesScaleFactor">
```

mesmer-input.txt

```
<scalar>0.974</scalar>
</property>
<property dictRef="me:vibFreqs">
  <array units="cm-1">
    55.9043
    125.6650
    191.3618
    218.9428
    265.0045
    342.7207
    406.0155
    473.9907
    614.7120
    819.6394
    866.4358
    918.8325
    966.0182
    1028.1013
    1095.7952
    1120.8356
    1190.9983
    1197.8317
    1224.0272
    1236.8164
    1310.5645
    1334.4684
    1397.2853
    1409.5260
    1454.8839
    1496.3648
    1500.1501
    1508.3999
    1518.1914
    1545.7755
    2897.0400
    3020.6213
    3081.8244
    3093.4255
    3094.2311
    3166.7333
    3171.9471
    3186.9942
    3200.0420
  </array>
</property>
<property dictRef="me:MW">
  <scalar units="amu">89.06025</scalar>
</property>
<property dictRef="me:spinMultiplicity">
  <scalar>2</scalar>
</property>
<property dictRef="me:epsilon">
  <scalar>500.0</scalar>
</property>
<property dictRef="me:sigma">
  <scalar>5.9</scalar>
```

mesmer-input.txt

```
</property>
</propertyList>
<me:energyTransferModel xsi:type="me:ExponentialDown">
  <me:deltaEDown units="cm-1">250.0</me:deltaEDown>
</me:energyTransferModel>
<me:DOSCMethod name="ClassicalRotors"/>
</molecule>
<molecule id="P1" spinMultiplicity="2">
  <propertyList>
    <property dictRef="me:ZPE">
      <scalar units="kJ/mol">-20.0</scalar>
    </property>
    <property dictRef="me:rotConsts">
      <array units="cm-1">
        0.2667820
        0.0669082
        0.0572131
      </array>
    </property>
    <property dictRef="me:symmetryNumber">
      <scalar>1</scalar>
    </property>
    <property dictRef="me:frequenciesScaleFactor">
      <scalar>0.974</scalar>
    </property>
    <property dictRef="me:vibFreqs">
      <array units="cm-1">
        55.9043
        125.6650
        191.3618
        218.9428
        265.0045
        342.7207
        406.0155
        473.9907
        614.7120
        819.6394
        866.4358
        918.8325
        966.0182
        1028.1013
        1095.7952
        1120.8356
        1190.9983
        1197.8317
        1224.0272
        1236.8164
        1310.5645
        1334.4684
        1397.2853
        1409.5260
        1454.8839
        1496.3648
        1500.1501
        1508.3999
        1518.1914
```

mesmer-input.txt

```
1545.7755
2897.0400
3020.6213
3081.8244
3093.4255
3094.2311
3166.7333
3171.9471
3186.9942
3200.0420
</array>
</property>
<property dictRef="me:MW">
  <scalar units="amu">89.06025</scalar>
</property>
<property dictRef="me:spinMultiplicity">
  <scalar>2</scalar>
</property>
<property dictRef="me:epsilon">
  <scalar>500.0</scalar>
</property>
<property dictRef="me:sigma">
  <scalar>5.9</scalar>
</property>
</propertyList>
<me:energyTransferModel xsi:type="me:ExponentialDown">
  <me:deltaEDown units="cm-1">250.0</me:deltaEDown>
</me:energyTransferModel>
<me:DOSMethod name="ClassicalRotors"/>
</molecule>
<molecule id="P2" spinMultiplicity="2">
  <propertyList>
    <property dictRef="me:ZPE">
      <scalar units="kJ/mol">-20.0</scalar>
    </property>
    <property dictRef="me:rotConsts">
      <array units="cm-1">
        0.2667820
        0.0669082
        0.0572131
      </array>
    </property>
    <property dictRef="me:symmetryNumber">
      <scalar>1</scalar>
    </property>
    <property dictRef="me:frequenciesScaleFactor">
      <scalar>0.974</scalar>
    </property>
    <property dictRef="me:vibFreqs">
      <array units="cm-1">
        55.9043
        125.6650
        191.3618
        218.9428
        265.0045
        342.7207
```

mesmer-input.txt

```
406.0155
473.9907
614.7120
819.6394
866.4358
918.8325
966.0182
1028.1013
1095.7952
1120.8356
1190.9983
1197.8317
1224.0272
1236.8164
1310.5645
1334.4684
1397.2853
1409.5260
1454.8839
1496.3648
1500.1501
1508.3999
1518.1914
1545.7755
2897.0400
3020.6213
3081.8244
3093.4255
3094.2311
3166.7333
3171.9471
3186.9942
3200.0420
</array>
</property>
<property dictRef="me:MW">
  <scalar units="amu">89.06025</scalar>
</property>
<property dictRef="me:spinMultiplicity">
  <scalar>2</scalar>
</property>
<property dictRef="me:epsilon">
  <scalar>500.0</scalar>
</property>
<property dictRef="me:sigma">
  <scalar>5.9</scalar>
</property>
</propertyList>
<me:energyTransferModel xsi:type="me:ExponentialDown">
  <me:deltaEDown units="cm-1">250.0</me:deltaEDown>
</me:energyTransferModel>
<me:DOSMethod name="ClassicalRotors"/>
</molecule>
<molecule id="P3" spinMultiplicity="2">
  <propertyList>
    <property dictRef="me:ZPE">
```

```
mesmer-input.txt
  <scalar units="kJ/mol">-20.0</scalar>
</property>
<property dictRef="me:rotConsts">
  <array units="cm-1">
    0.2667820
    0.0669082
    0.0572131
  </array>
</property>
<property dictRef="me:symmetryNumber">
  <scalar>1</scalar>
</property>
<property dictRef="me:frequenciesScaleFactor">
  <scalar>0.974</scalar>
</property>
<property dictRef="me:vibFreqs">
  <array units="cm-1">
    55.9043
    125.6650
    191.3618
    218.9428
    265.0045
    342.7207
    406.0155
    473.9907
    614.7120
    819.6394
    866.4358
    918.8325
    966.0182
    1028.1013
    1095.7952
    1120.8356
    1190.9983
    1197.8317
    1224.0272
    1236.8164
    1310.5645
    1334.4684
    1397.2853
    1409.5260
    1454.8839
    1496.3648
    1500.1501
    1508.3999
    1518.1914
    1545.7755
    2897.0400
    3020.6213
    3081.8244
    3093.4255
    3094.2311
    3166.7333
    3171.9471
    3186.9942
    3200.0420
```

mesmer-input.txt

```
</array>
</property>
<property dictRef="me:MW">
  <scalar units="amu">89.06025</scalar>
</property>
<property dictRef="me:spinMultiplicity">
  <scalar>2</scalar>
</property>
<property dictRef="me:epsilon">
  <scalar>500.0</scalar>
</property>
<property dictRef="me:sigma">
  <scalar>5.9</scalar>
</property>
</propertyList>
<me:energyTransferModel xsi:type="me:ExponentialDown">
  <me:deltaEDown units="cm-1">250.0</me:deltaEDown>
</me:energyTransferModel>
<me:DOSCMMethod name="ClassicalRotors"/>
</molecule>
<molecule id="P4" spinMultiplicity="2">
  <propertyList>
    <property dictRef="me:ZPE">
      <scalar units="kJ/mol">-20.0</scalar>
    </property>
    <property dictRef="me:rotConsts">
      <array units="cm-1">
        0.2667820
        0.0669082
        0.0572131
      </array>
    </property>
    <property dictRef="me:symmetryNumber">
      <scalar>1</scalar>
    </property>
    <property dictRef="me:frequenciesScaleFactor">
      <scalar>0.974</scalar>
    </property>
    <property dictRef="me:vibFreqs">
      <array units="cm-1">
        55.9043
        125.6650
        191.3618
        218.9428
        265.0045
        342.7207
        406.0155
        473.9907
        614.7120
        819.6394
        866.4358
        918.8325
        966.0182
        1028.1013
        1095.7952
        1120.8356
      </array>
    </property>
  </propertyList>
</molecule>
```

mesmer-input.txt

```
1190.9983
1197.8317
1224.0272
1236.8164
1310.5645
1334.4684
1397.2853
1409.5260
1454.8839
1496.3648
1500.1501
1508.3999
1518.1914
1545.7755
2897.0400
3020.6213
3081.8244
3093.4255
3094.2311
3166.7333
3171.9471
3186.9942
3200.0420
</array>
</property>
<property dictRef="me:MW">
  <scalar units="amu">89.06025</scalar>
</property>
<property dictRef="me:spinMultiplicity">
  <scalar>2</scalar>
</property>
<property dictRef="me:epsilon">
  <scalar>500.0</scalar>
</property>
<property dictRef="me:sigma">
  <scalar>5.9</scalar>
</property>
</propertyList>
<me:energyTransferModel xsi:type="me:ExponentialDown">
  <me:deltaEDown units="cm-1">250.0</me:deltaEDown>
</me:energyTransferModel>
<me:DOSCMETHOD name="ClassicalRotors"/>
</molecule>
<molecule id="TS1_De_CH3">
  <propertyList>
    <property dictRef="me:ZPE">
      <scalar units="kJ/mol">28.8</scalar>
    </property>
    <property dictRef="me:rotConsts">
      <array units="cm-1">
        0.2158646
        0.0701244
        0.0613086
      </array>
    </property>
    <property dictRef="me:symmetryNumber">
```



mesmer-input.txt

```
<scalar>1</scalar>
</property>
<property dictRef="me:frequenciesScaleFactor">
  <scalar>0.974</scalar>
</property>
<property dictRef="me:vibFreqs">
  <array units="cm-1">
    80.4989
    135.9771
    156.1413
    227.0309
    251.7943
    270.2083
    389.0961
    440.6791
    671.7967
    675.6480
    793.1712
    815.6592
    878.3779
    955.6753
    1064.1102
    1095.8978
    1143.1751
    1185.1041
    1199.3712
    1313.3665
    1354.6523
    1402.0203
    1426.5096
    1436.2436
    1442.9997
    1491.2644
    1505.4518
    1530.9940
    1570.3997
    3031.5122
    3062.2460
    3071.5581
    3092.3545
    3110.6660
    3135.6353
    3152.0913
    3248.9503
    3260.3795
  </array>
</property>
<property dictRef="me:MW">
  <scalar units="amu">89.06025</scalar>
</property>
<property dictRef="me:spinMultiplicity">
  <scalar>2</scalar>
</property>
<property dictRef="me:imFreqs">
  <scalar units="cm-1">571.7592</scalar>
</property>
```

mesmer-input.txt

```
</propertyList>
<me:DOSCMethod>ClassicalRotors</me:DOSCMethod>
</molecule>
<molecule id="TS2_De_H">
  <propertyList>
    <property dictRef="me:ZPE">
      <scalar units="kJ/mol">39.2</scalar>
    </property>
    <property dictRef="me:rotConsts">
      <array units="cm-1">
        0.2683776
        0.0687436
        0.0576338
      </array>
    </property>
    <property dictRef="me:symmetryNumber">
      <scalar>1</scalar>
    </property>
    <property dictRef="me:frequenciesScaleFactor">
      <scalar>0.974</scalar>
    </property>
    <property dictRef="me:vibFreqs">
      <array units="cm-1">
        88.1355
        143.2249
        191.0211
        204.6218
        278.5567
        375.3742
        423.1791
        534.9778
        606.2305
        666.3969
        696.0305
        814.0074
        884.2501
        970.6192
        1025.6887
        1075.2071
        1117.8869
        1158.6199
        1188.9142
        1271.7352
        1312.5949
        1395.4053
        1406.2907
        1438.5339
        1478.2479
        1486.7360
        1498.6143
        1504.3550
        1527.9876
        1658.8648
        3064.5460
        3069.1508
        3071.5557
      </array>
    </property>
  </propertyList>
</molecule>
```

mesmer-input.txt

```
3111.8382
3149.5571
3151.6337
3152.8472
3189.7142
</array>
</property>
<property dictRef="me:MW">
  <scalar units="amu">89.06025</scalar>
</property>
<property dictRef="me:spinMultiplicity">
  <scalar>2</scalar>
</property>
<property dictRef="me:imFreqs">
  <scalar units="cm-1">1113.9666</scalar>
</property>
</propertyList>
<me:DOSMethod>ClassicalRotors</me:DOSMethod>
</molecule>
<molecule id="TS3_CO_Break">
  <propertyList>
    <property dictRef="me:ZPE">
      <scalar units="kJ/mol">78.2</scalar>
    </property>
    <property dictRef="me:rotConsts">
      <array units="cm-1">
        0.2618818
        0.0626148
        0.0540039
      </array>
    </property>
    <property dictRef="me:symmetryNumber">
      <scalar>1</scalar>
    </property>
    <property dictRef="me:frequenciesScaleFactor">
      <scalar>0.974</scalar>
    </property>
    <property dictRef="me:vibFreqs">
      <array units="cm-1">
        57.0692
        111.3627
        157.7522
        203.7515
        283.1068
        309.661
        333.1093
        459.1481
        519.055
        816.5497
        885.566
        909.8426
        970.8621
        1012.0191
        1111.2411
        1137.7094
        1163.7767
```

mesmer-input.txt

```
1179.3438
1290.1841
1361.9524
1379.552
1398.665
1399.6102
1468.9907
1481.2331
1492.9223
1505.2013
1530.6407
1575.0424
3018.6194
3049.803
3067.5355
3069.8208
3104.2884
3144.7796
3151.1296
3157.6907
3173.0741
</array>
</property>
<property dictRef="me:MW">
  <scalar units="amu">89.06025</scalar>
</property>
<property dictRef="me:spinMultiplicity">
  <scalar>2</scalar>
</property>
<property dictRef="me:imFreqs">
  <scalar units="cm-1">616.0307</scalar>
</property>
</propertyList>
<me:DOSMethod>ClassicalRotors</me:DOSMethod>
</molecule>
<molecule id="TS4_H_Shift">
  <propertyList>
    <property dictRef="me:ZPE">
      <scalar units="kJ/mol">58.8</scalar>
    </property>
    <property dictRef="me:rotConsts">
      <array units="cm-1">
        0.2320350
        0.0918939
        0.0716145
      </array>
    </property>
    <property dictRef="me:symmetryNumber">
      <scalar>1</scalar>
    </property>
    <property dictRef="me:frequenciesScaleFactor">
      <scalar>0.974</scalar>
    </property>
    <property dictRef="me:vibFreqs">
      <array units="cm-1">
        128.7383
```

```
216.3656
282.2269
315.4198
405.9988
482.9925
533.6941
607.5925
731.6792
860.7941
869.1666
921.0216
961.8909
1089.9562
1120.3486
1132.7786
1138.9471
1176.4197
1191.3359
1277.1777
1303.5677
1374.3155
1384.5320
1397.7548
1423.8545
1460.6730
1484.5011
1493.4576
1503.8118
1573.3953
3009.8452
3030.8486
3070.2889
3102.0749
3115.1884
3156.1156
3162.8423
3199.8431
</array>
</property>
<property dictRef="me:MW">
  <scalar units="amu">89.06025</scalar>
</property>
<property dictRef="me:spinMultiplicity">
  <scalar>2</scalar>
</property>
<property dictRef="me:imFreqs">
  <scalar units="cm-1">1579.1212</scalar>
</property>
</propertyList>
<me:DOSMethod>ClassicalRotors</me:DOSMethod>
</molecule>
<molecule id="N2">
  <atom elementType="N2"/>
  <propertyList>
    <property dictRef="me:epsilon">
      <scalar>48.0</scalar>
```

mesmer-input.txt

```
</property>
<property dictRef="me:sigma">
  <scalar>3.9</scalar>
</property>
<property dictRef="me:MW">
  <scalar>28.0</scalar>
</property>
</propertyList>
</molecule>
</moleculeList>
<reactionList>
<reaction id="R1_De_CH3">
  <reactant>
    <molecule ref="CH3CH2OCHOCH3" role="modelled" />
  </reactant>
  <product>
    <molecule ref="P1" role="sink" />
  </product>
  <me:transitionState>
    <molecule ref="TS1_De_CH3" role="transitionState" />
  </me:transitionState>
  <me:tunneling name="Eckart"/>
  <me:MCRCMethod name="SimpleRRKM"/>
</reaction>
<reaction id="R2_De_H">
  <reactant>
    <molecule ref="CH3CH2OCHOCH3" role="modelled" />
  </reactant>
  <product>
    <molecule ref="P2" role="sink" />
  </product>
  <me:transitionState>
    <molecule ref="TS2_De_H" role="transitionState" />
  </me:transitionState>
  <me:tunneling name="Eckart"/>
  <me:MCRCMethod name="SimpleRRKM"/>
</reaction>
<reaction id="R3_CO_Break">
  <reactant>
    <molecule ref="CH3CH2OCHOCH3" role="modelled" />
  </reactant>
  <product>
    <molecule ref="P3" role="sink" />
  </product>
  <me:transitionState>
    <molecule ref="TS3_CO_Break" role="transitionState" />
  </me:transitionState>
  <me:tunneling name="Eckart"/>
  <me:MCRCMethod name="SimpleRRKM"/>
</reaction>
<reaction id="R4_H_Shift">
  <reactant>
    <molecule ref="CH3CH2OCHOCH3" role="modelled" />
  </reactant>
  <product>
    <molecule ref="P4" role="sink" />
  </product>
```

mesmer-input.txt

```
</product>
<me:transitionState>
  <molecule ref="TS4_H_Shift" role="transitionState" />
</me:transitionState>
<me:tunneling name="Eckart"/>
<me:MCRCMethod name="SimpleRRKM"/>
</reaction>
</reactionList>
<me:conditions>
  <me:bathGas>N2</me:bathGas>
  <me:PTs>
    <me:PTpair units="Torr" P="760.0" T="233.0" />
    <me:PTpair units="Torr" P="760.0" T="243.0" />
    <me:PTpair units="Torr" P="760.0" T="253.0" />
    <me:PTpair units="Torr" P="760.0" T="263.0" />
    <me:PTpair units="Torr" P="760.0" T="273.0" />
    <me:PTpair units="Torr" P="760.0" T="283.0" />
    <me:PTpair units="Torr" P="760.0" T="293.0" />
    <me:PTpair units="Torr" P="760.0" T="298.0" />
    <me:PTpair units="Torr" P="760.0" T="303.0" />
    <me:PTpair units="Torr" P="760.0" T="313.0" />
    <me:PTpair units="Torr" P="760.0" T="323.0" />
    <me:PTpair units="Torr" P="760.0" T="333.0" />
  </me:PTs>
  <me:InitialPopulation>
    <me:molecule ref="CH3CH2OCHOCH3" population="1.0" />
  </me:InitialPopulation>
</me:conditions>
<me:modelParameters>
  <!--Specify grain size directly...-->
  <me:grainSize units="cm-1">50</me:grainSize>
  <!--...or by the total number of grains
    <me:numberOfGrains> 500 </me:numberOfGrains>-->
  <!--Specify increased energy range
    <me:maxTemperature>6000</me:maxTemperature>-->
  <me:energyAboveTheTopHill>30.0</me:energyAboveTheTopHill>
  <me:automaticallySetMaxEne>1.0e-09</me:automaticallySetMaxEne>
</me:modelParameters>
<me:control>
  <me:printSpeciesProfile />
  <me:testRateConstants />
  <me:eigenvalues>10</me:eigenvalues>
</me:control>
</me:mesmer>
```
